# Supplementary material for: Luminescent Er3+ based single molecule magnets with fluorinated alkoxide or aryloxide ligands
Source: Royal Society of Chemistry journal article supplement (doi:10.1039/d3dt04375d), 2024-01-01
Supplement: d3dt04375d1.pdf [file d3dt04375d1.pdf]

## ELECTRONIC SUPPORTING INFORMATION

### Luminescent Er<sup>3+</sup> Based Single Molecule Magnets with Fluorinated Alkoxide or Aryloxy Ligands

Alexander A. Selikhov,<sup>a,b</sup> Gautier Félix,<sup>c</sup> Dmitry M. Lyubov,<sup>a,b</sup> Yulia V. Nelyubina,<sup>a</sup> Anton V. Cherkasov,<sup>b</sup> Saad Sene,<sup>c</sup> Ilya V. Taydakov,<sup>d</sup> Mikhail T. Metlin,<sup>a</sup> Andrey A. Tyutyunov,<sup>a</sup> Yannick Guari,<sup>c</sup> Joulia Larionova\*<sup>c</sup> and Alexander A. Trifonov\*<sup>a,b</sup>

<sup>a</sup> *A. N. Nesmeyanov Institute of Organoelement Compounds of Russian Academy of Sciences, 28 Vavilova str., 119334, Moscow, Russia. E-mail: trif@iomc.ras.ru*

<sup>b</sup> *Institute of Organometallic Chemistry of Russian Academy of Sciences, 49 Tropinina str., GSP-445, 630950, Nizhny Novgorod, Russia. E-mail: trif@iomc.ras.ru*

<sup>c</sup> *ICGM, Univ. Montpellier, CNRS, ENSCM, Montpellier, France. E-mail: joulia.larionova@umontpellier.fr*

<sup>d</sup> *N. D. Zelinsky Institute of Organic Chemistry Russian Academy of Sciences, Leninsky Prospect, 47, 119991, Moscow, Russia*

## TABLE OF CONTENTS

|                                                                                                                                                                                                                                                                                                                                                                                                                                                                                                                                                                        |    |
|------------------------------------------------------------------------------------------------------------------------------------------------------------------------------------------------------------------------------------------------------------------------------------------------------------------------------------------------------------------------------------------------------------------------------------------------------------------------------------------------------------------------------------------------------------------------|----|
| <b>SUPPORTING INFORMATION</b> .....                                                                                                                                                                                                                                                                                                                                                                                                                                                                                                                                    | 1  |
| Figure S1. Perspective view of the crystal packing for 1 along the crystallographic axis <i>b</i> . Color code: light green Er; yellow F; red O; grey C. Hydrogen atoms and crystallized solvent molecules have been omitted for clarity. ....                                                                                                                                                                                                                                                                                                                         | 5  |
| Figure S2. Perspective view of the crystal packing for 2 along the crystallographic axis <i>c</i> . Color code: light green Er; yellow F; red O; grey C. Hydrogen atoms and crystallized solvent molecules have been omitted for clarity. ....                                                                                                                                                                                                                                                                                                                         | 5  |
| Figure S3. Perspective view of the crystal packing for 3 along the crystallographic axis <i>a</i> . Color code: light green Er; yellow F; red O; grey C. Hydrogen atoms and crystallized solvent molecules have been omitted for clarity. ....                                                                                                                                                                                                                                                                                                                         | 6  |
| Figure S4. Perspective view of the crystal packing for 4 along the crystallographic axis <i>c</i> . Color code: light green Er; yellow F; red O; grey C. Hydrogen atoms and crystallized solvent molecules have been omitted for clarity. ....                                                                                                                                                                                                                                                                                                                         | 7  |
| Figure S5. Perspective view of the crystal packing for 5 along the crystallographic axis <i>a</i> . Color code: light green Er; yellow F; red O; grey C. Hydrogen atoms and crystallized solvent molecules have been omitted for clarity. ....                                                                                                                                                                                                                                                                                                                         | 8  |
| Figure S6. Perspective view of the crystal packing for 6 along the crystallographic axis <i>a</i> . Color code: light green Er; yellow F; red O; grey C. Hydrogen atoms and crystallized solvent molecules have been omitted for clarity. ....                                                                                                                                                                                                                                                                                                                         | 9  |
| Figure S7. Frequency dependence of $\chi'$ (a) and $\chi''$ (c) for 2 at 1.8 K performed under various applied dc fields. (b) Cole-Cole plots obtained using the frequency dependence of $\chi''$ for 2 at 1.8 K under various dc field. The solid lines correspond to the best fit obtained with a generalized Debye model. (d) Field dependence of the relaxation time curve for 2. The red line represents the fit using equation (1).....                                                                                                                          | 10 |
| Figure S8. Frequency dependence of the in-phase, $\chi'$ , (a) and out-of-phase, $\chi''$ (c) components of the ac susceptibility for 2 under applied magnetic field of 1000 Oe. The red lines are the result of the Cole-Cole fitting. (b) Cole-Cole plots obtained using the frequency dependence of $\chi''$ for 2 obtained under 1000 Oe. The solid lines correspond to the best fit obtained with a generalized Debye model. (d) Temperature dependence of the relaxation time for 2 (1000 Oe) and the corresponding fit with eq. (2) (red solid line).....       | 11 |
| Figure S9. Frequency dependence of $\chi'$ (a) and $\chi''$ (c) for 3 at 1.8 K performed under various applied dc fields. (b) Cole-Cole plots obtained using the frequency dependence of $\chi''$ for 3 at 1.8 K under various dc field. The solid lines correspond to the best fit obtained with a generalized Debye model. (d) Field dependence of the relaxation time curve for 3 for the lowest relaxation time. The red line represents the fit using equation (1).....                                                                                           | 12 |
| Figure S10. Frequency dependence of the in-phase, $\chi'$ , (a) and out-of-phase, $\chi''$ (c) components of the ac susceptibility for 3 under applied magnetic field of 1200 Oe. The red lines are the result of the Cole-Cole fitting. (b) Cole-Cole plots obtained using the frequency dependence of $\chi''$ for 3 obtained under 1000 Oe. The solid lines correspond to the best fit obtained with a generalized Debye model. (d) Temperature dependence of the two relaxation times for 3 (1200 Oe) and the corresponding fit with eq. (2) (red solid line)..... | 13 |

|                                                                                                                                                                                                                                                                                                                                                                                                                                                                                                                                                                        |    |
|------------------------------------------------------------------------------------------------------------------------------------------------------------------------------------------------------------------------------------------------------------------------------------------------------------------------------------------------------------------------------------------------------------------------------------------------------------------------------------------------------------------------------------------------------------------------|----|
| Figure S11. Frequency dependence of $\chi'$ (a) and $\chi''$ (c) for 4 at 1.8 K performed under various applied dc fields. (b) Cole-Cole plots obtained using the frequency dependence of $\chi''$ for 4 at 1.8 K under various dc field. The solid lines correspond to the best fit obtained with a generalized Debye model. (d) Field dependence of the relaxation time curve for 4 for the lowest relaxation time. The red line represents the fit using equation (1).....                                                                                          | 14 |
| Figure S12. Frequency dependence of the in-phase, $\chi'$ , (a) and out-of-phase, $\chi''$ (c) components of the ac susceptibility for 4 under applied magnetic field of 1000 Oe. The red lines are the result of the Cole-Cole fitting. (b) Cole-Cole plots obtained using the frequency dependence of $\chi''$ for 4 obtained under 1000 Oe. The solid lines correspond to the best fit obtained with a generalized Debye model. (d) Temperature dependence of the two relaxation times for 4 (1000 Oe) and the corresponding fit with eq. (2) (red solid line)..... | 15 |
| Figure S13. Frequency dependence of $\chi'$ (a) and $\chi''$ (c) for 5 at 1.8 K performed under various applied dc fields. (b) Cole-Cole plots obtained using the frequency dependence of $\chi''$ for 5 at 1.8 K under various dc field. The solid lines correspond to the best fit obtained with a generalized Debye model. (d) Field dependence of the relaxation time curve for 5 for the lowest relaxation time. The red line represents the fit using equation (1).....                                                                                          | 16 |
| Figure S14. Frequency dependence of the in-phase, $\chi'$ , (a) and out-of-phase, $\chi''$ (c) components of the ac susceptibility for 5 under applied magnetic field of 1000 Oe. The red lines are the result of the Cole-Cole fitting. (b) Cole-Cole plots obtained using the frequency dependence of $\chi''$ for 5 obtained under 1000 Oe. The solid lines correspond to the best fit obtained with a generalized Debye model. (d) Temperature dependence of the two relaxation times for 5 (1000 Oe) and the corresponding fit with eq. (2) (red solid line)..... | 17 |
| Figure S15. Frequency dependence of $\chi'$ (a) and $\chi''$ (c) for 6 at 1.8 K performed under various applied dc fields. (b) Cole-Cole plots obtained using the frequency dependence of $\chi''$ for 6 at 1.8 K under various dc field. The solid lines correspond to the best fit obtained with a generalized Debye model. (d) Field dependence of the relaxation time curve for 6 for the lowest relaxation time. The red line represents the fit using equation (1).....                                                                                          | 18 |
| Figure S16. Frequency dependence of the in-phase, $\chi'$ , (a) and out-of-phase, $\chi''$ (c) components of the ac susceptibility for 6 under applied magnetic field of 1000 Oe. The red lines are the result of the Cole-Cole fitting. (b) Cole-Cole plots obtained using the frequency dependence of $\chi''$ for 6 obtained under 1000 Oe. The solid lines correspond to the best fit obtained with a generalized Debye model. (d) Temperature dependence of the two relaxation times for 6 (1000 Oe) and the corresponding fit with eq. (2) (red solid line)..... | 19 |
| Figure S17. IR spectrum of [4- <i>t</i> BuC <sub>6</sub> H <sub>2</sub> (2,6-benzhydryl)O] <sub>3</sub> Er(THF) 1.....                                                                                                                                                                                                                                                                                                                                                                                                                                                 | 20 |
| Figure S18. IR spectrum of [(C <sub>6</sub> F <sub>5</sub> ) <sub>3</sub> CO] <sub>3</sub> Er(Me <sub>3</sub> SiOH) 2.....                                                                                                                                                                                                                                                                                                                                                                                                                                             | 20 |
| Figure S19. IR spectrum of [(C <sub>6</sub> F <sub>5</sub> ) <sub>3</sub> CO] <sub>3</sub> Er((Me <sub>3</sub> Si) <sub>2</sub> NH) 3.....                                                                                                                                                                                                                                                                                                                                                                                                                             | 21 |
| Figure S20. IR spectrum of [(C <sub>6</sub> F <sub>5</sub> ) <sub>3</sub> CO] <sub>3</sub> Er(C <sub>6</sub> H <sub>5</sub> CH <sub>3</sub> ) 4.....                                                                                                                                                                                                                                                                                                                                                                                                                   | 21 |
| Figure S21. IR spectrum of [(C <sub>6</sub> F <sub>5</sub> ) <sub>3</sub> CO] <sub>3</sub> Er( <i>o</i> -Me <sub>2</sub> NC <sub>6</sub> H <sub>4</sub> CH <sub>3</sub> ) 5.....                                                                                                                                                                                                                                                                                                                                                                                       | 22 |
| Figure S22. IR spectrum of {[Ph(F <sub>3</sub> C) <sub>2</sub> CO] <sub>2</sub> Er(μ-OC(CF <sub>3</sub> ) <sub>2</sub> Ph)] <sub>2</sub> 6.....                                                                                                                                                                                                                                                                                                                                                                                                                        | 22 |

|                                                                                                                                                                                                                                                                                                                                                                                                                                              |    |
|----------------------------------------------------------------------------------------------------------------------------------------------------------------------------------------------------------------------------------------------------------------------------------------------------------------------------------------------------------------------------------------------------------------------------------------------|----|
| Figure S23. Luminescence kinetics of complex 4 in solid phase at temperatures of 77 and 300 K under optical excitation through ligand environment (360 nm). Recording wavelength is 1535 nm.....                                                                                                                                                                                                                                             | 23 |
| Figure S24. Experimental luminescence emission spectra for crystalline complexes 2 at 77 K (a) and 300 K (b). The blue and green curves represent the experimental data and the optimized fit. The black and red Lorentzian functions represent the radiative relaxation from the first and second $^4I_{13/2}$ states, respectively. c) Schematic representation of the energy levels for sample 2, extracted from the fitting process..... | 23 |
| Figure S25. Experimental luminescence emission spectra for crystalline complexes 3 at 77 K (a) and 300 K (b). The blue and green curves represent the experimental data and the optimized fit. The black and red Lorentzian functions represent the radiative relaxation from the first and second $^4I_{13/2}$ states, respectively. c) Schematic representation of the energy levels for sample 3, extracted from the fitting process..... | 24 |
| Figure S26. Experimental luminescence emission spectra for crystalline complexes 4 at 77 K (a) and 300 K (b). The blue and green curves represent the experimental data and the optimized fit. The black and red Lorentzian functions represent the radiative relaxation from the first and second $^4I_{13/2}$ states, respectively. c) Schematic representation of the energy levels for sample 4, extracted from the fitting process..... | 24 |
| Figure S27. Experimental luminescence emission spectra for crystalline complexes 5 at 77 K (a) and 300 K (b). The blue and green curves represent the experimental data and the optimized fit. The black and red Lorentzian functions represent the radiative relaxation from the first and second $^4I_{13/2}$ states, respectively. c) Schematic representation of the energy levels for sample 5, extracted from the fitting process..... | 25 |
| Figure S28. Experimental luminescence emission spectra for crystalline complexes 6 at 77 K (a) and 300 K (b). The blue and green curves represent the experimental data and the optimized fit. The black and red Lorentzian functions represent the radiative relaxation from the first and second $^4I_{13/2}$ states, respectively. c) Schematic representation of the energy levels for sample 6, extracted from the fitting process..... | 25 |
| Table S1: Representative examples of $Er^{3+}$ luminescent SMMs.....                                                                                                                                                                                                                                                                                                                                                                         | 26 |
| Table S2: Crystal data, data collection and structure refinement details for 1-6.....                                                                                                                                                                                                                                                                                                                                                        | 28 |
| Table S3. Main magnetic parameters utilized in Equation (1) for samples 1-6.....                                                                                                                                                                                                                                                                                                                                                             | 30 |

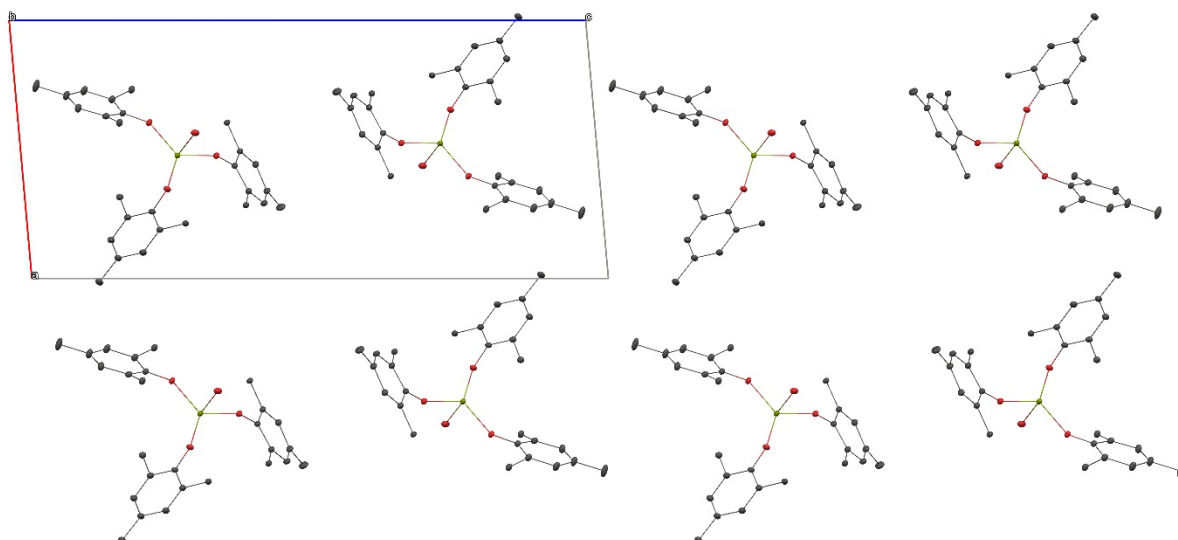

**Figure S1.** Perspective view of the crystal packing for **1** along the crystallographic axis *b*. Color code: light green Er; yellow F; red O; grey C. Hydrogen atoms and crystallized solvent molecules have been omitted for clarity.

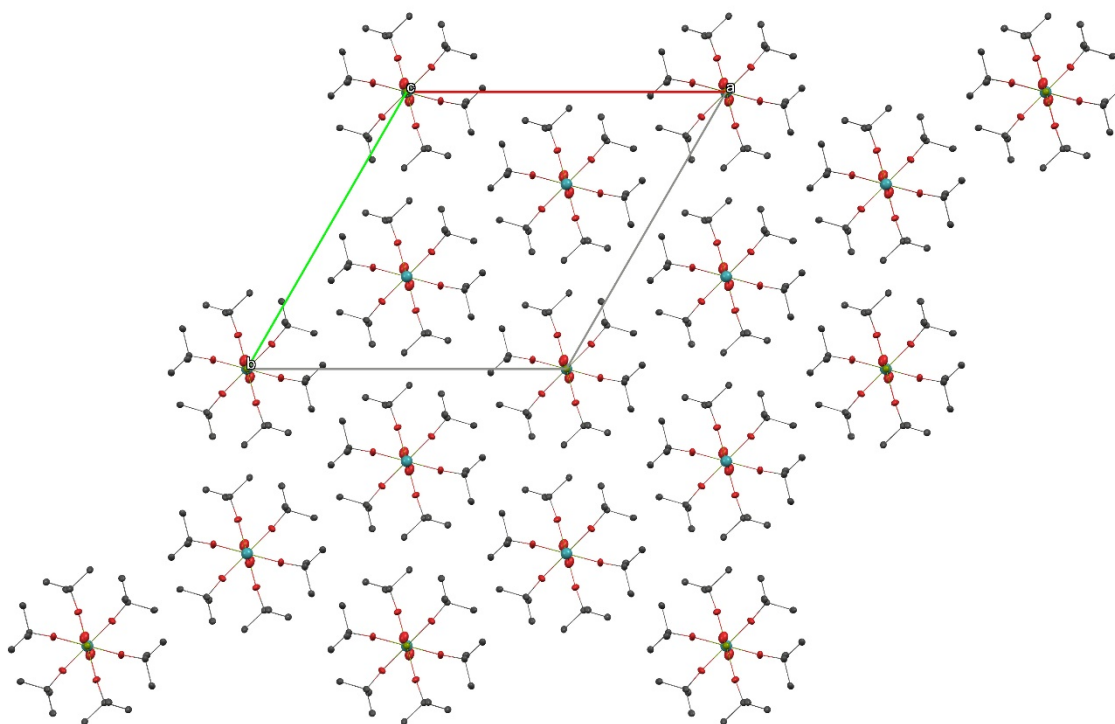

**Figure S2.** Perspective view of the crystal packing for **2** along the crystallographic axis *c*. Color code: light green Er; yellow F; red O; grey C. Hydrogen atoms and crystallized solvent molecules have been omitted for clarity.

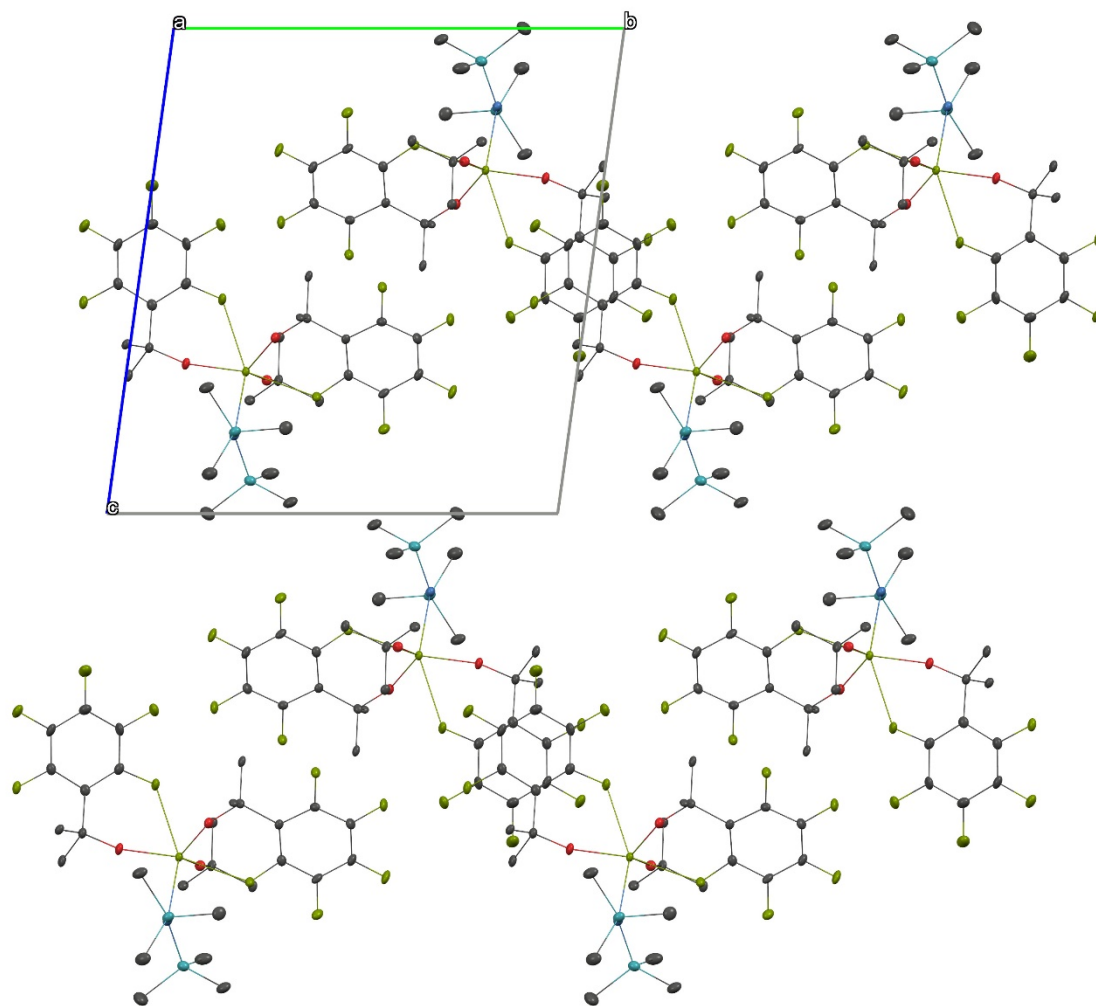

**Figure S3.** Perspective view of the crystal packing for **3** along the crystallographic axis *a*. Color code: light green Er; yellow F; red O; grey C. Hydrogen atoms and crystallized solvent molecules have been omitted for clarity.

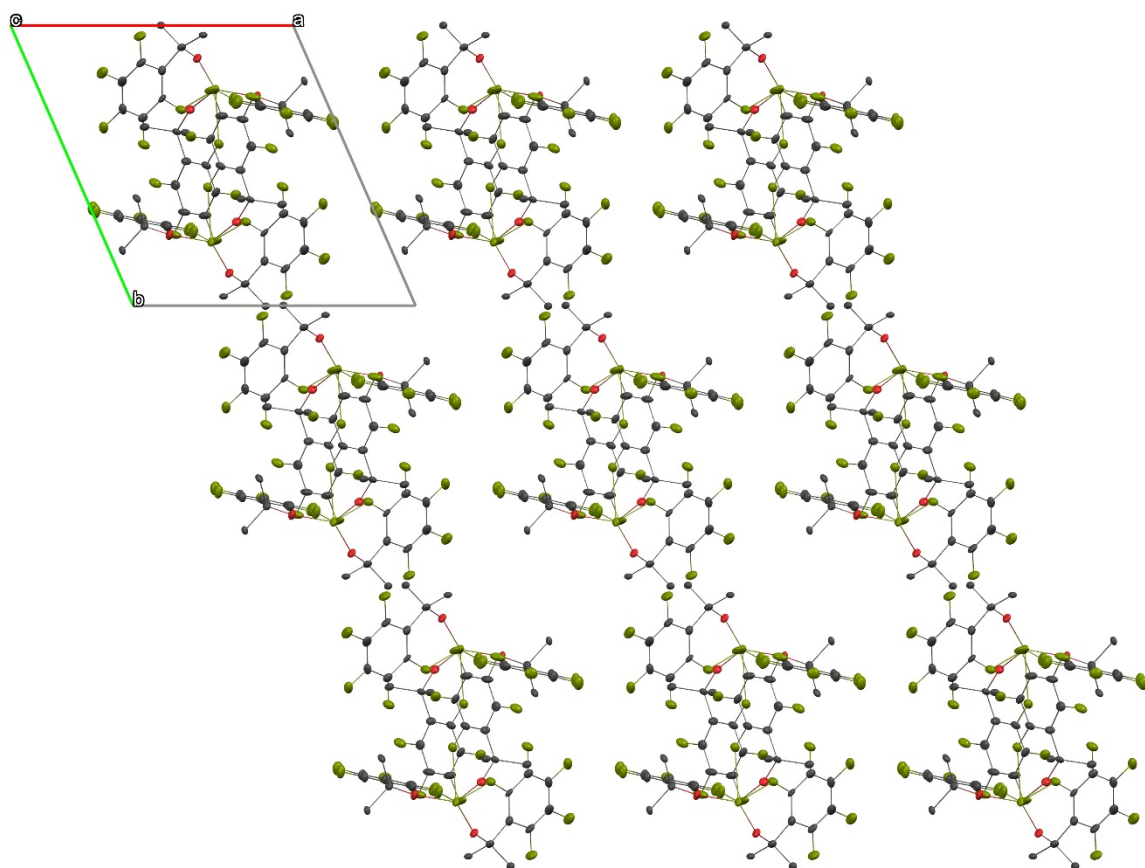

**Figure S4.** Perspective view of the crystal packing for **4** along the crystallographic axis *c*. Color code: light green Er; yellow F; red O; grey C. Hydrogen atoms and crystallized solvent molecules have been omitted for clarity.

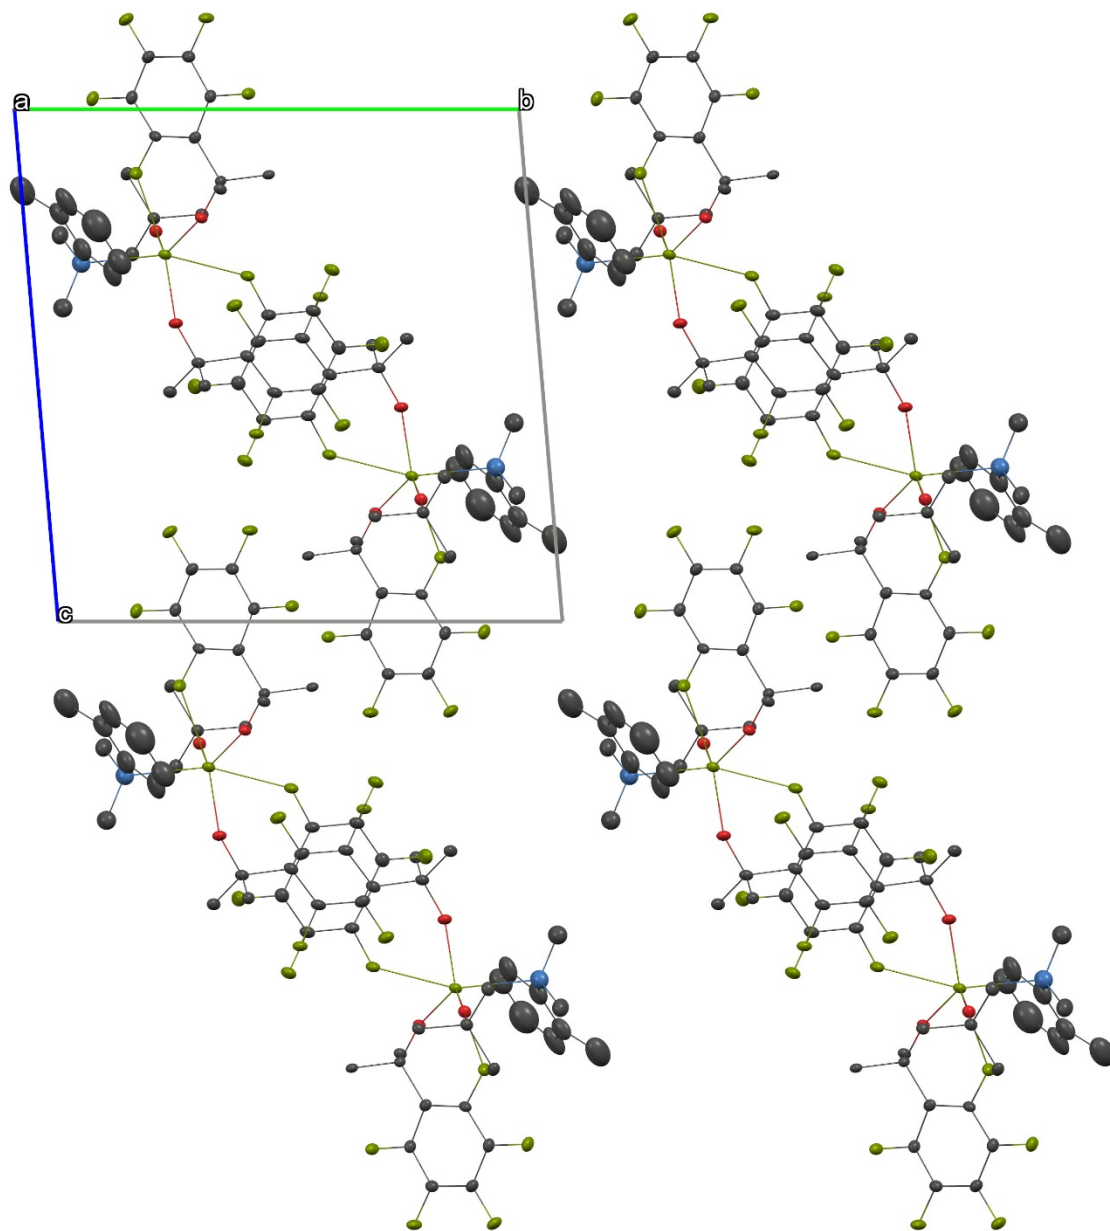

**Figure S5.** Perspective view of the crystal packing for **5** along the crystallographic axis *a*. Color code: light green Er; yellow F; red O; grey C. Hydrogen atoms and crystallized solvent molecules have been omitted for clarity.



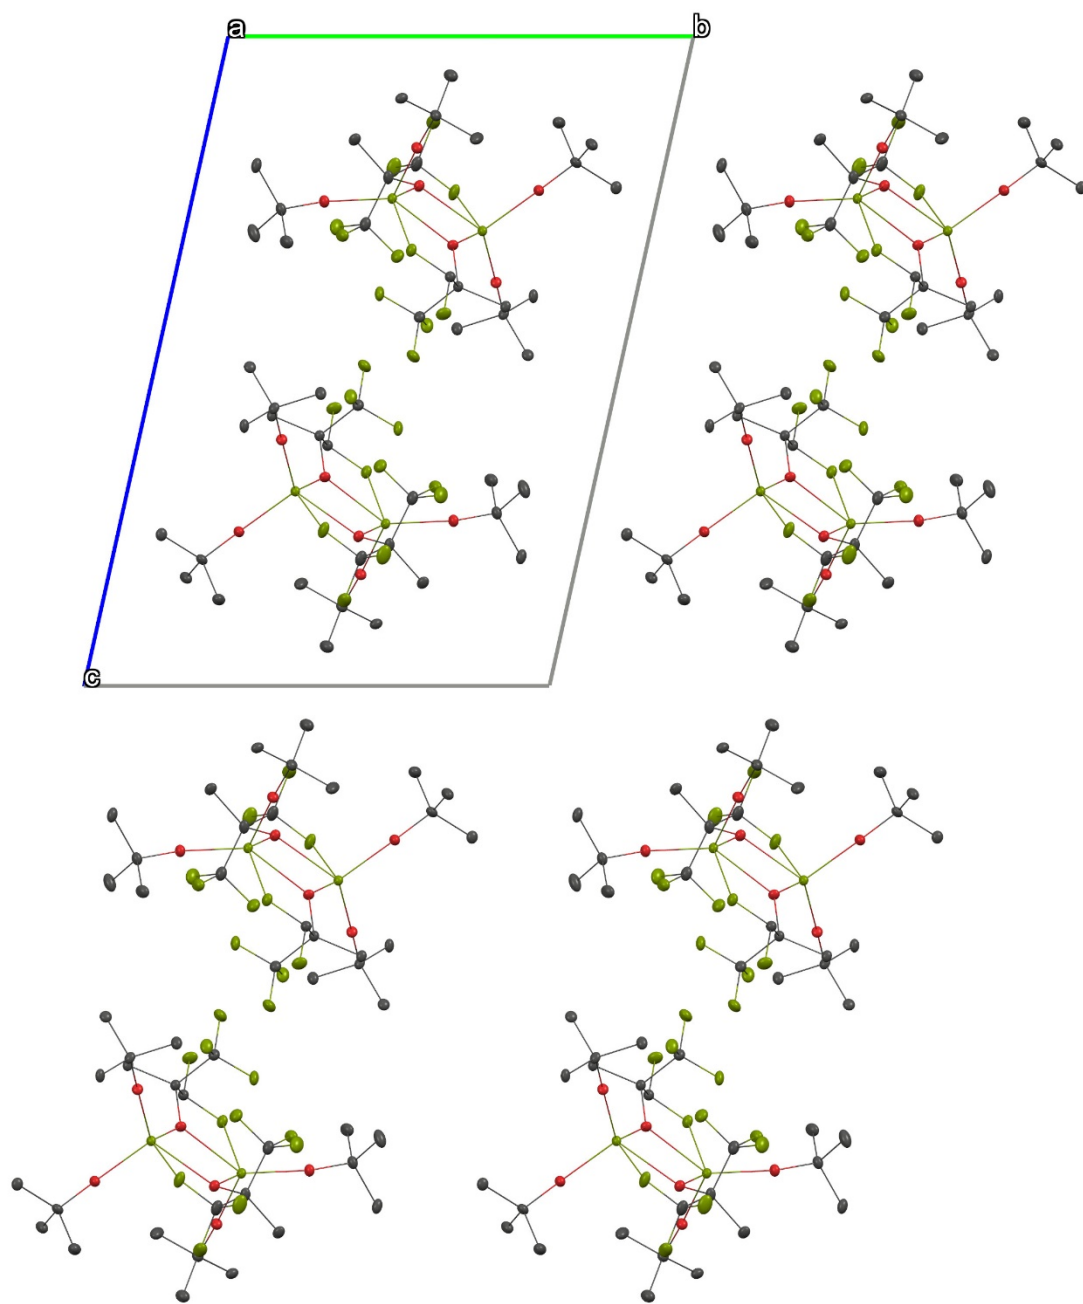

**Figure S6.** Perspective view of the crystal packing for **6** along the crystallographic axis *a*. Color code: light green Er; yellow F; red O; grey C. Hydrogen atoms and crystallized solvent molecules have been omitted for clarity.

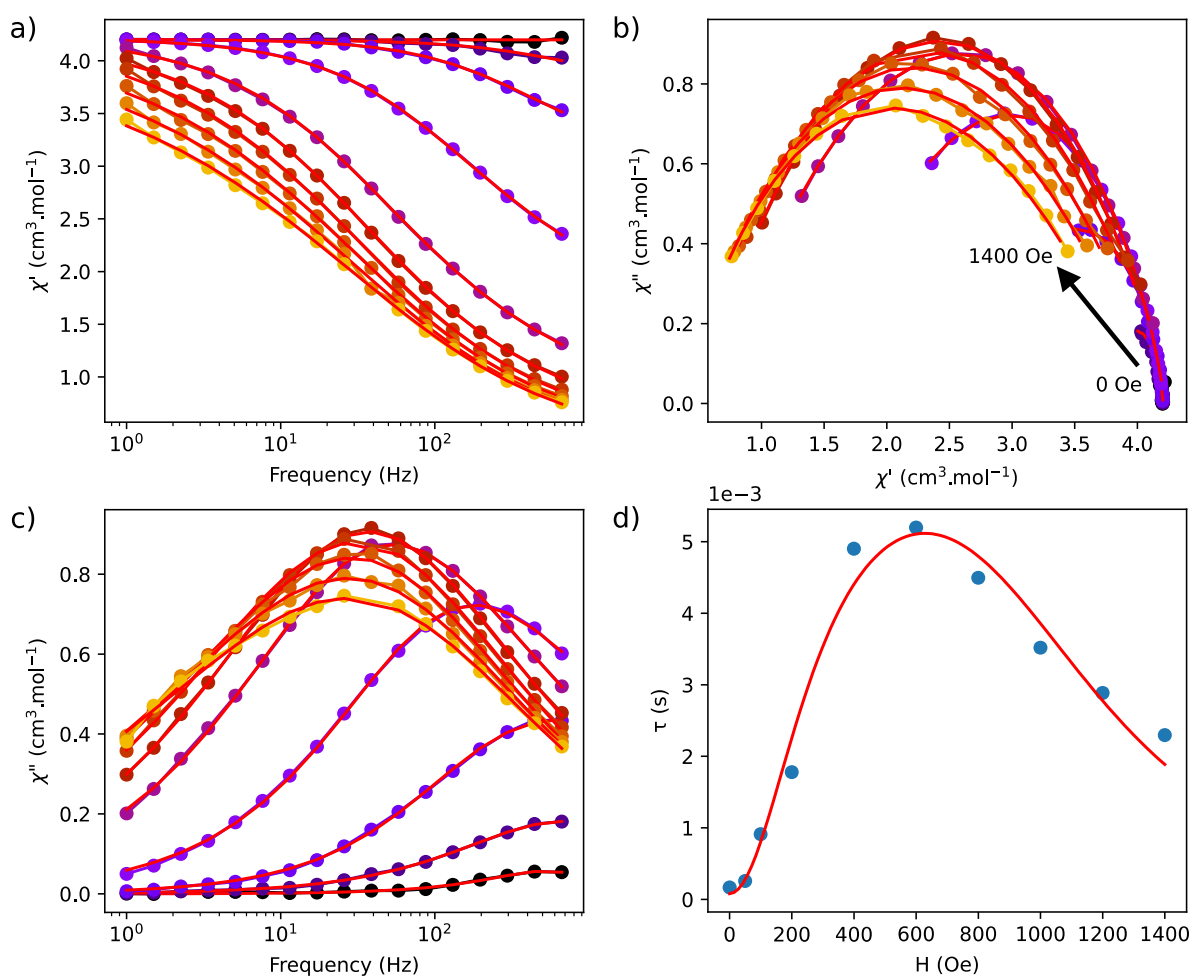

**Figure S7.** Frequency dependence of  $\chi'$  (a) and  $\chi''$  (c) for **2** at 1.8 K performed under various applied dc fields. (b) Cole-Cole plots obtained using the frequency dependence of  $\chi''$  for **2** at 1.8 K under various dc field. The solid lines correspond to the best fit obtained with a generalized Debye model. (d) Field dependence of the relaxation time curve for **2**. The red line represents the fit using equation (1).

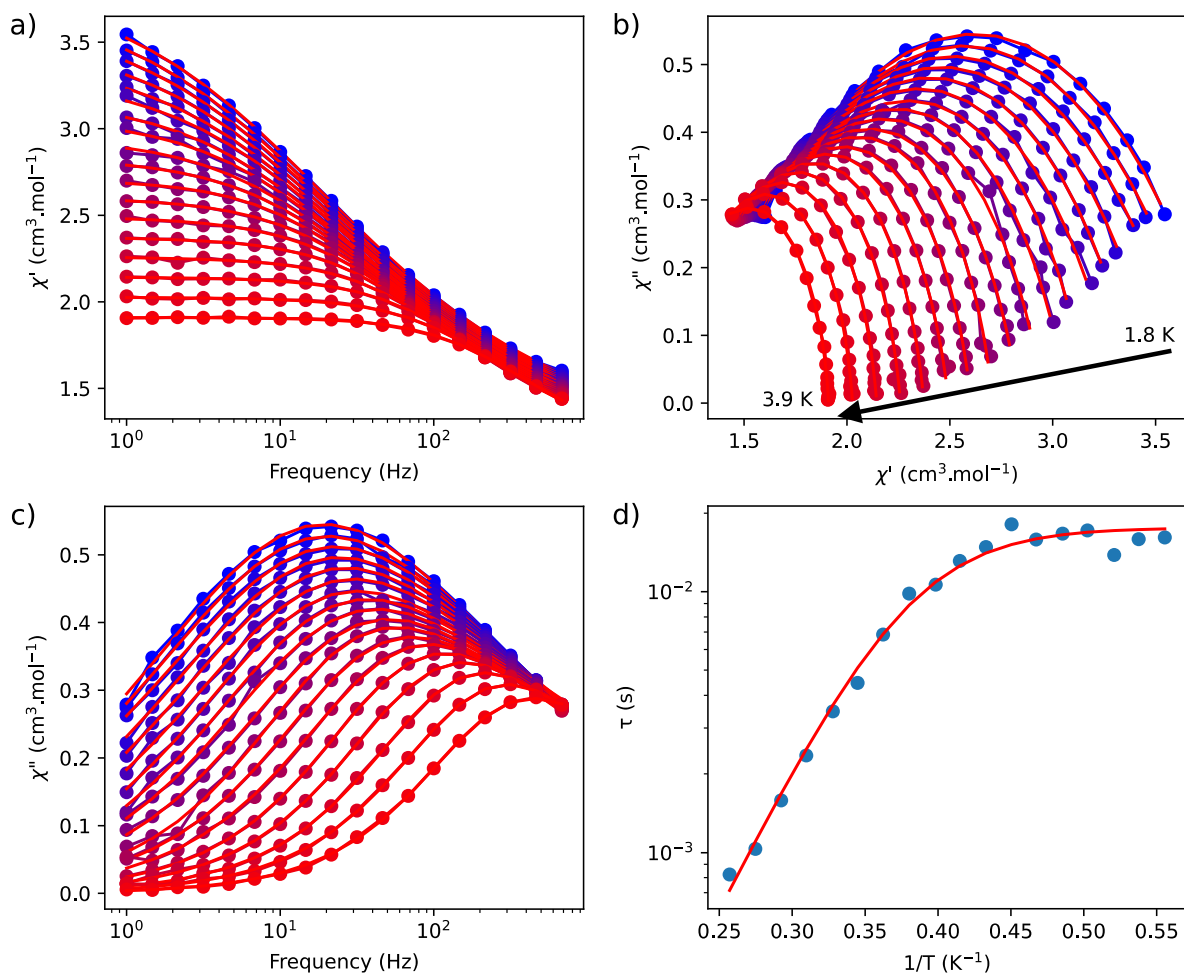

**Figure S8.** Frequency dependence of the in-phase,  $\chi'$ , (a) and out-of-phase,  $\chi''$  (c) components of the ac susceptibility for **2** under applied magnetic field of 1000 Oe. The red lines are the result of the Cole-Cole fitting. (b) Cole-Cole plots obtained using the frequency dependence of  $\chi''$  for **2** obtained under 1000 Oe. The solid lines correspond to the best fit obtained with a generalized Debye model. (d) Temperature dependence of the relaxation time for **2** (1000 Oe) and the corresponding fit with eq. (2) (red solid line).

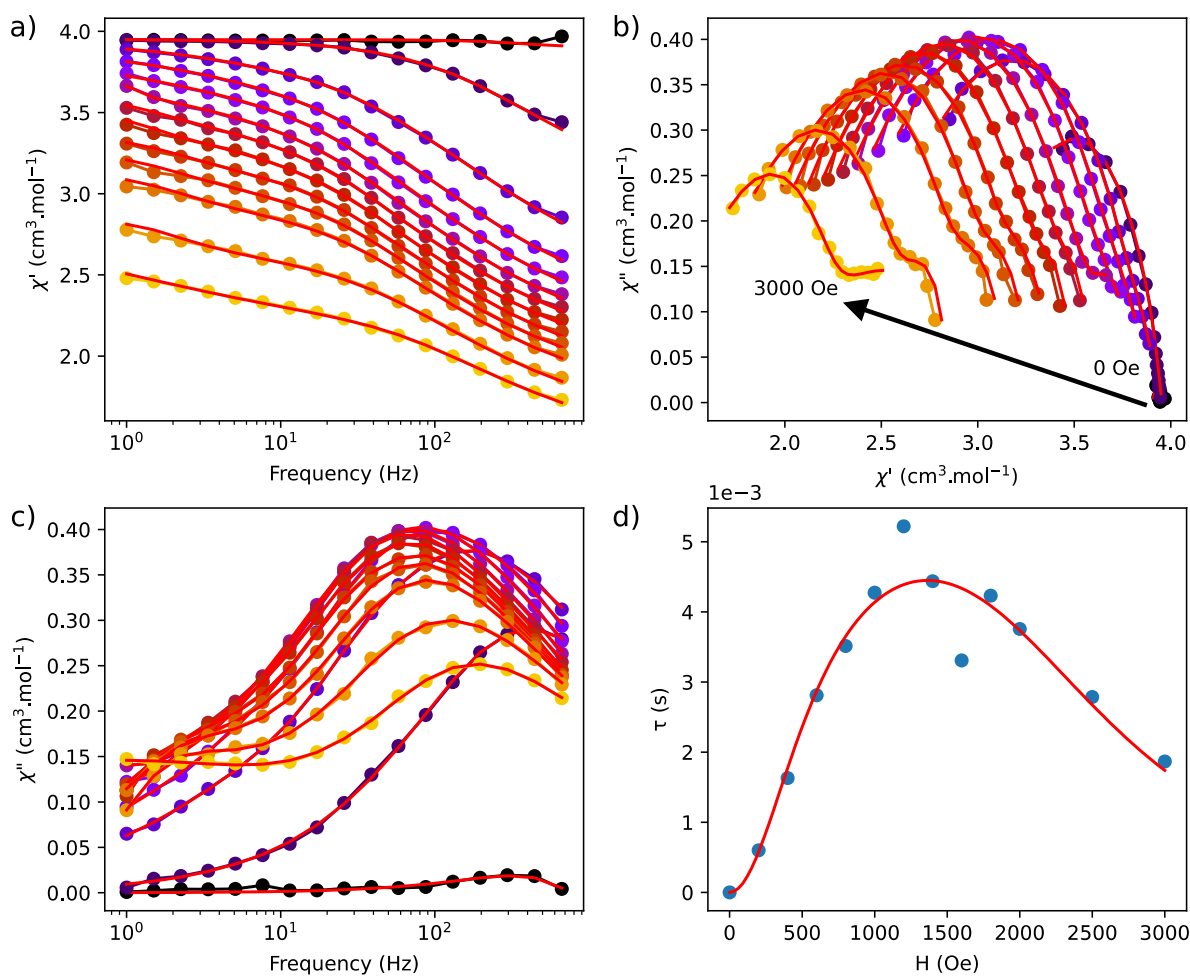

**Figure S9.** Frequency dependence of  $\chi'$  (a) and  $\chi''$  (c) for **3** at 1.8 K performed under various applied dc fields. (b) Cole-Cole plots obtained using the frequency dependence of  $\chi''$  for **3** at 1.8 K under various dc field. The solid lines correspond to the best fit obtained with a generalized Debye model. (d) Field dependence of the relaxation time curve for **3** for the lowest relaxation time. The red line represents the fit using equation (1).

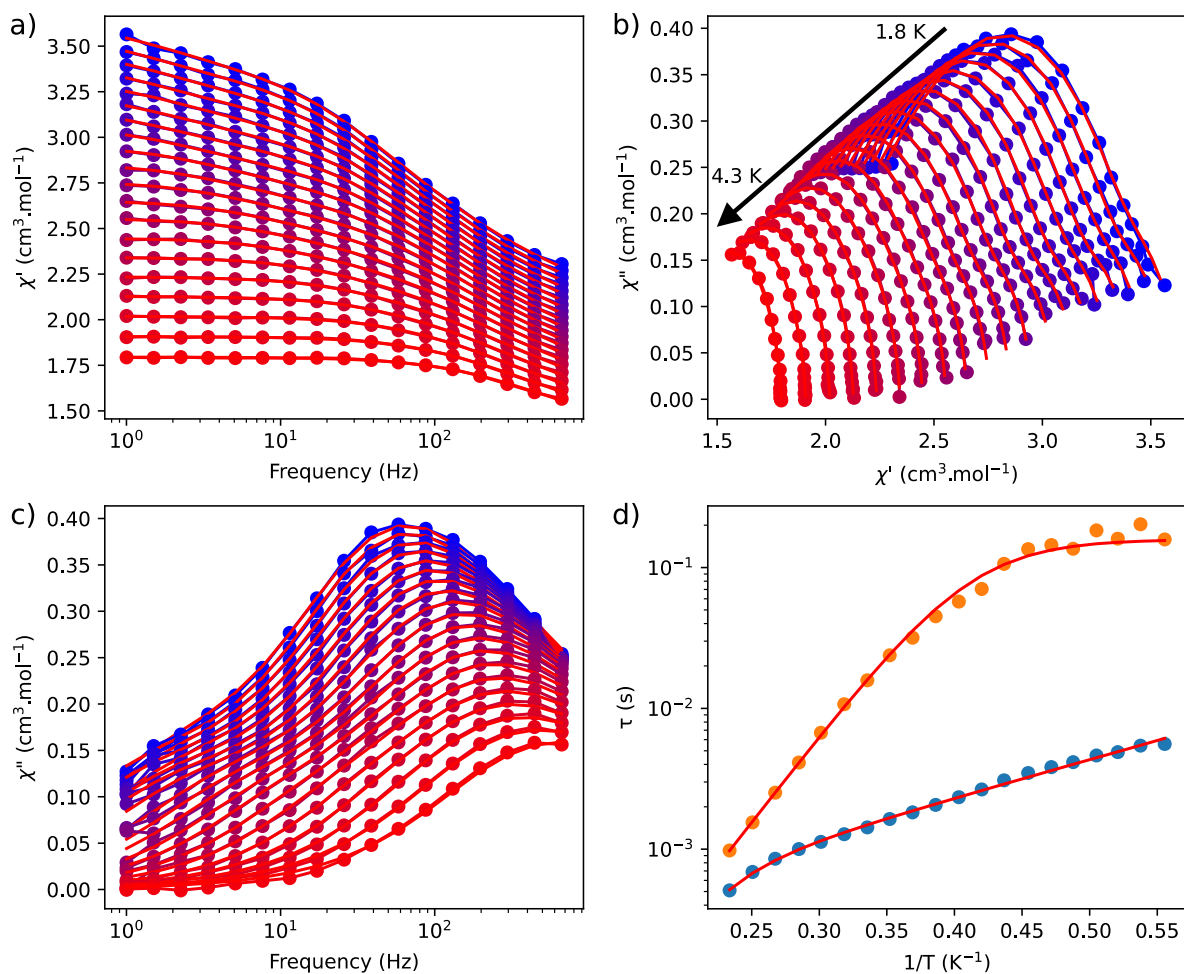

**Figure S10.** Frequency dependence of the in-phase,  $\chi'$ , (a) and out-of-phase,  $\chi''$  (c) components of the ac susceptibility for **3** under applied magnetic field of 1200 Oe. The red lines are the result of the Cole-Cole fitting. (b) Cole-Cole plots obtained using the frequency dependence of  $\chi''$  for **3** obtained under 1000 Oe. The solid lines correspond to the best fit obtained with a generalized Debye model. (d) Temperature dependence of the two relaxation times for **3** (1200 Oe) and the corresponding fit with eq. (2) (red solid line).

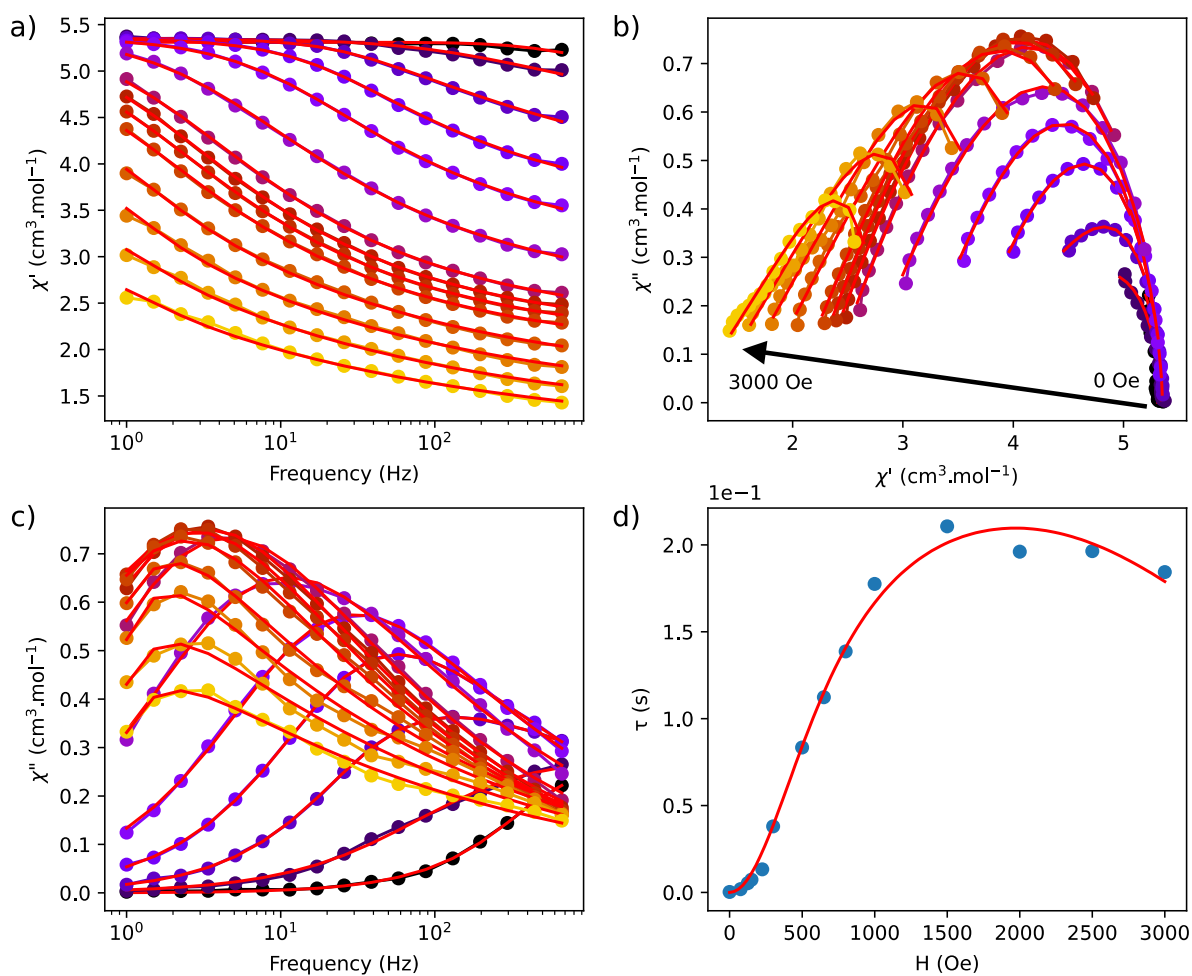

**Figure S11.** Frequency dependence of  $\chi'$  (a) and  $\chi''$  (c) for **4** at 1.8 K performed under various applied dc fields. (b) Cole-Cole plots obtained using the frequency dependence of  $\chi''$  for **4** at 1.8 K under various dc field. The solid lines correspond to the best fit obtained with a generalized Debye model. (d) Field dependence of the relaxation time curve for **4** for the lowest relaxation time. The red line represents the fit using equation (1).

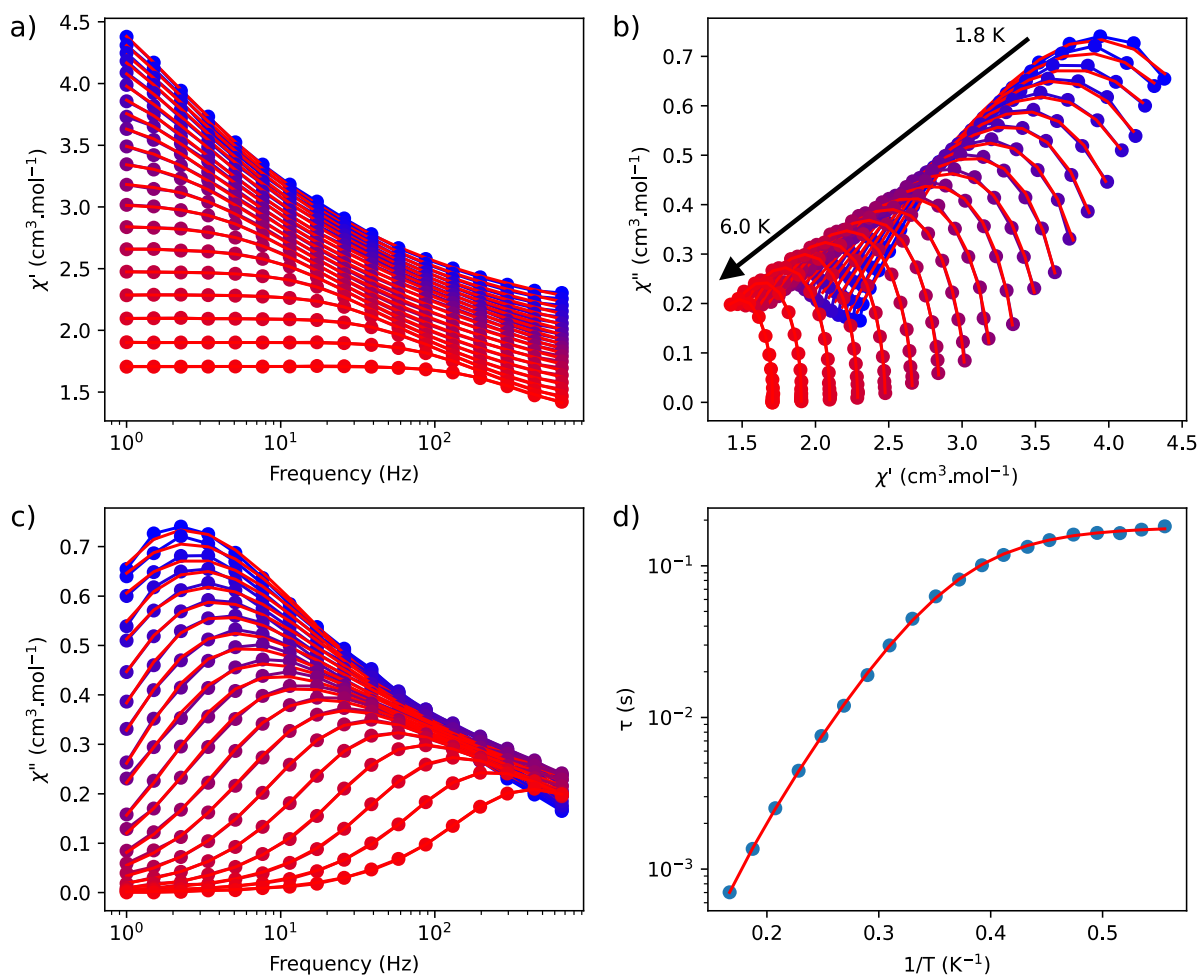

**Figure S12.** Frequency dependence of the in-phase,  $\chi'$ , (a) and out-of-phase,  $\chi''$  (c) components of the ac susceptibility for **4** under applied magnetic field of 1000 Oe. The red lines are the result of the Cole-Cole fitting. (b) Cole-Cole plots obtained using the frequency dependence of  $\chi''$  for **4** obtained under 1000 Oe. The solid lines correspond to the best fit obtained with a generalized Debye model. (d) Temperature dependence of the two relaxation times for **4** (1000 Oe) and the corresponding fit with eq. (2) (red solid line).

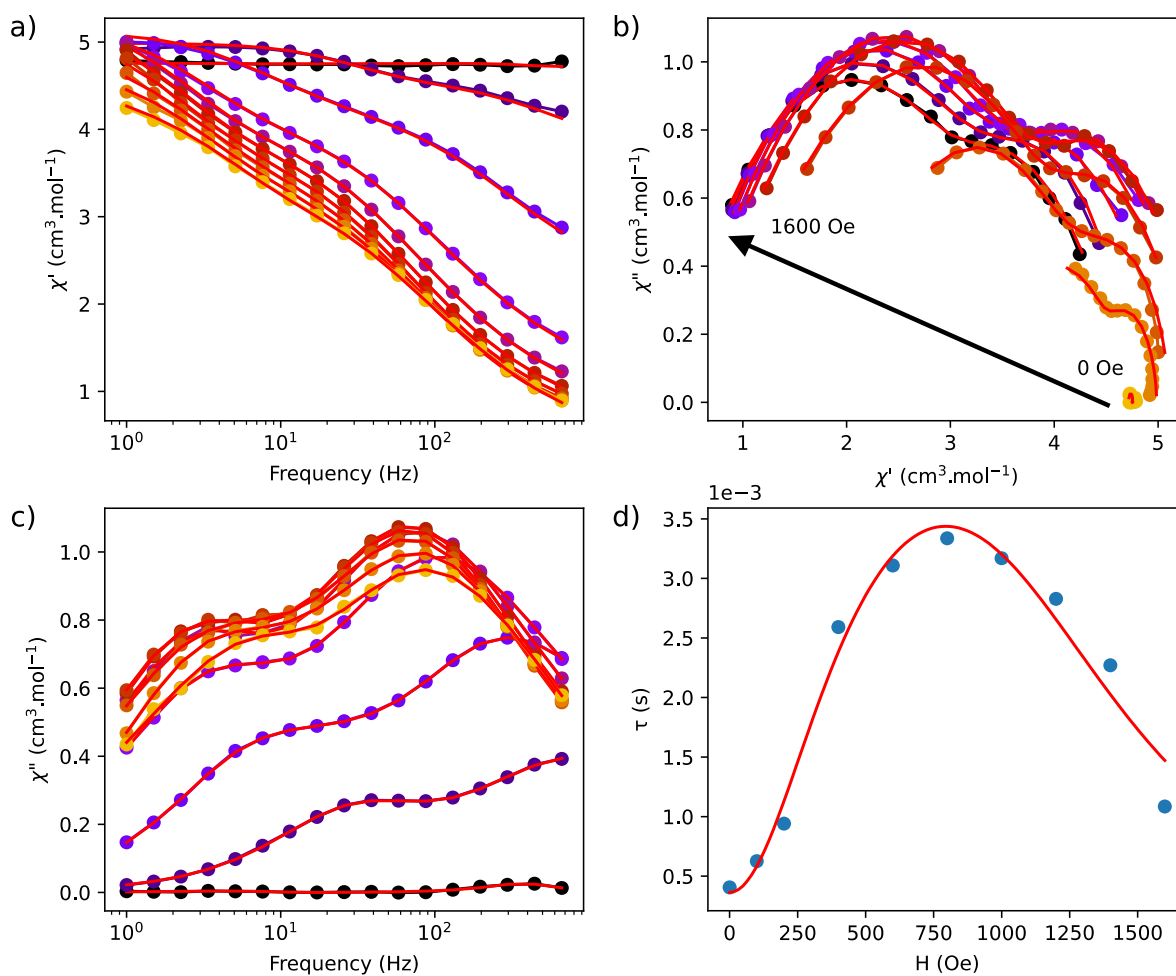

**Figure S13.** Frequency dependence of  $\chi'$  (a) and  $\chi''$  (c) for **5** at 1.8 K performed under various applied dc fields. (b) Cole-Cole plots obtained using the frequency dependence of  $\chi''$  for **5** at 1.8 K under various dc field. The solid lines correspond to the best fit obtained with a generalized Debye model. (d) Field dependence of the relaxation time curve for **5** for the lowest relaxation time. The red line represents the fit using equation (1).



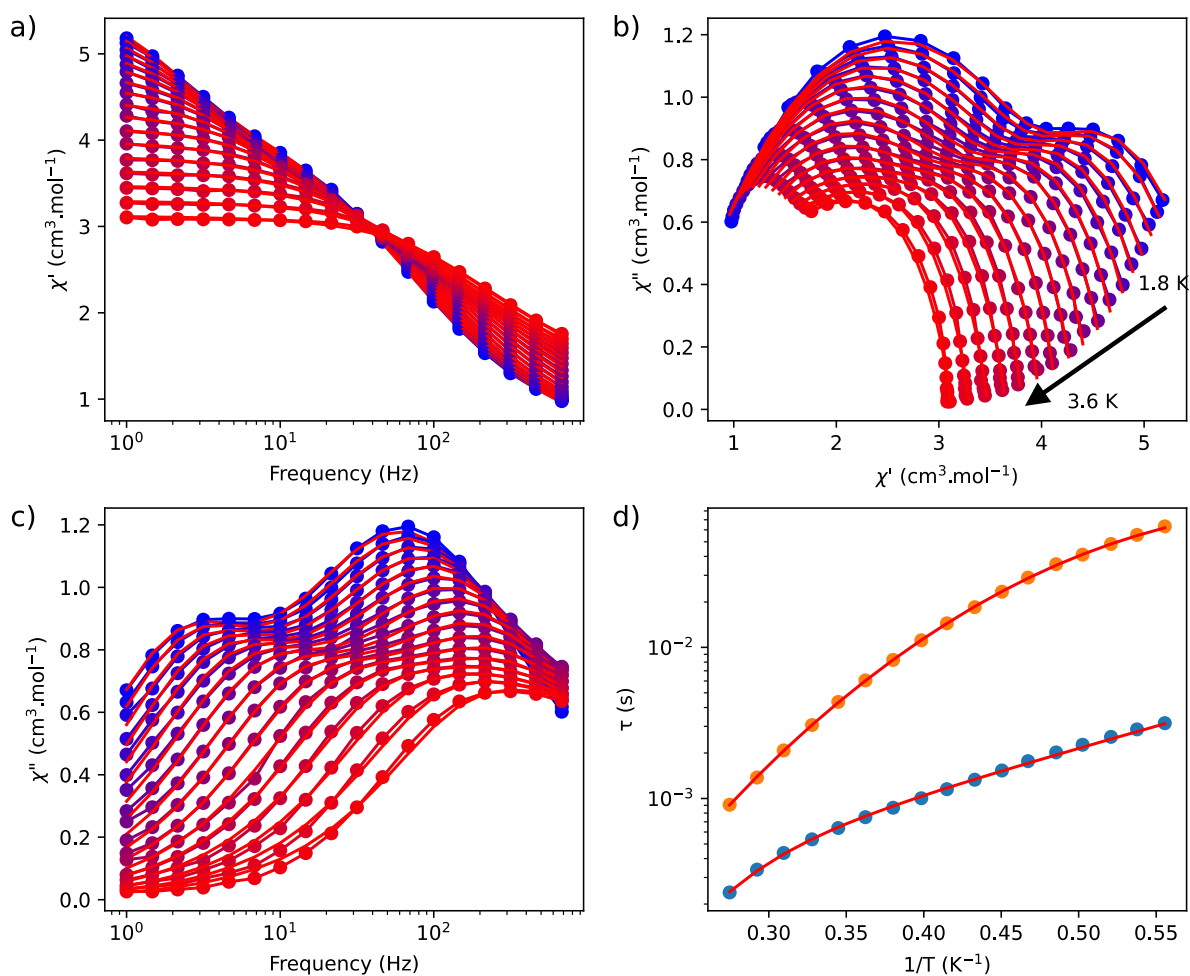

**Figure S14.** Frequency dependence of the in-phase,  $\chi'$ , (a) and out-of-phase,  $\chi''$  (c) components of the ac susceptibility for **5** under applied magnetic field of 1000 Oe. The red lines are the result of the Cole-Cole fitting. (b) Cole-Cole plots obtained using the frequency dependence of  $\chi''$  for **5** obtained under 1000 Oe. The solid lines correspond to the best fit obtained with a generalized Debye model. (d) Temperature dependence of the two relaxation times for **5** (1000 Oe) and the corresponding fit with eq. (2) (red solid line).

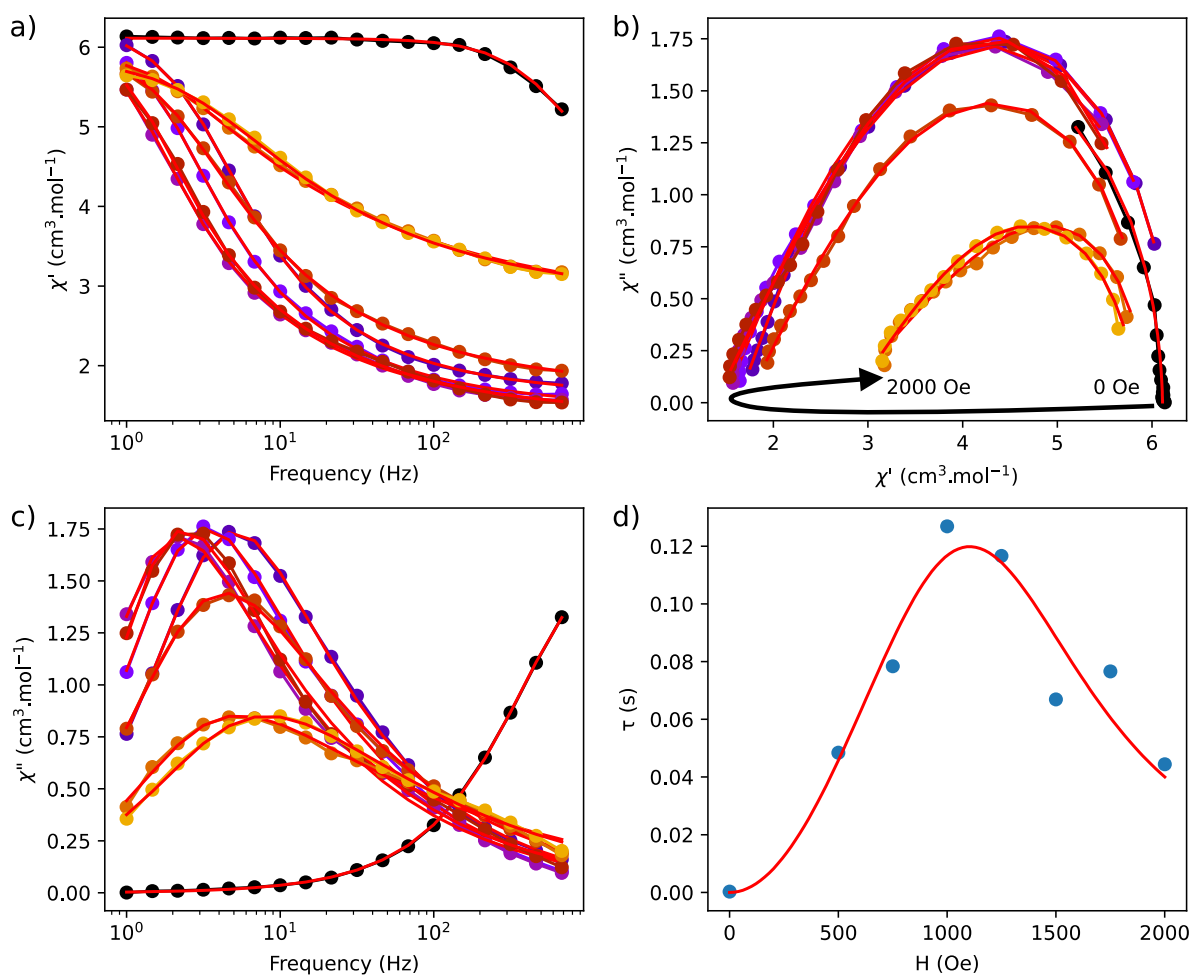

**Figure S15.** Frequency dependence of  $\chi'$  (a) and  $\chi''$  (c) for **6** at 1.8 K performed under various applied dc fields. (b) Cole-Cole plots obtained using the frequency dependence of  $\chi''$  for **6** at 1.8 K under various dc field. The solid lines correspond to the best fit obtained with a generalized Debye model. (d) Field dependence of the relaxation time curve for **6** for the lowest relaxation time. The red line represents the fit using equation (1).

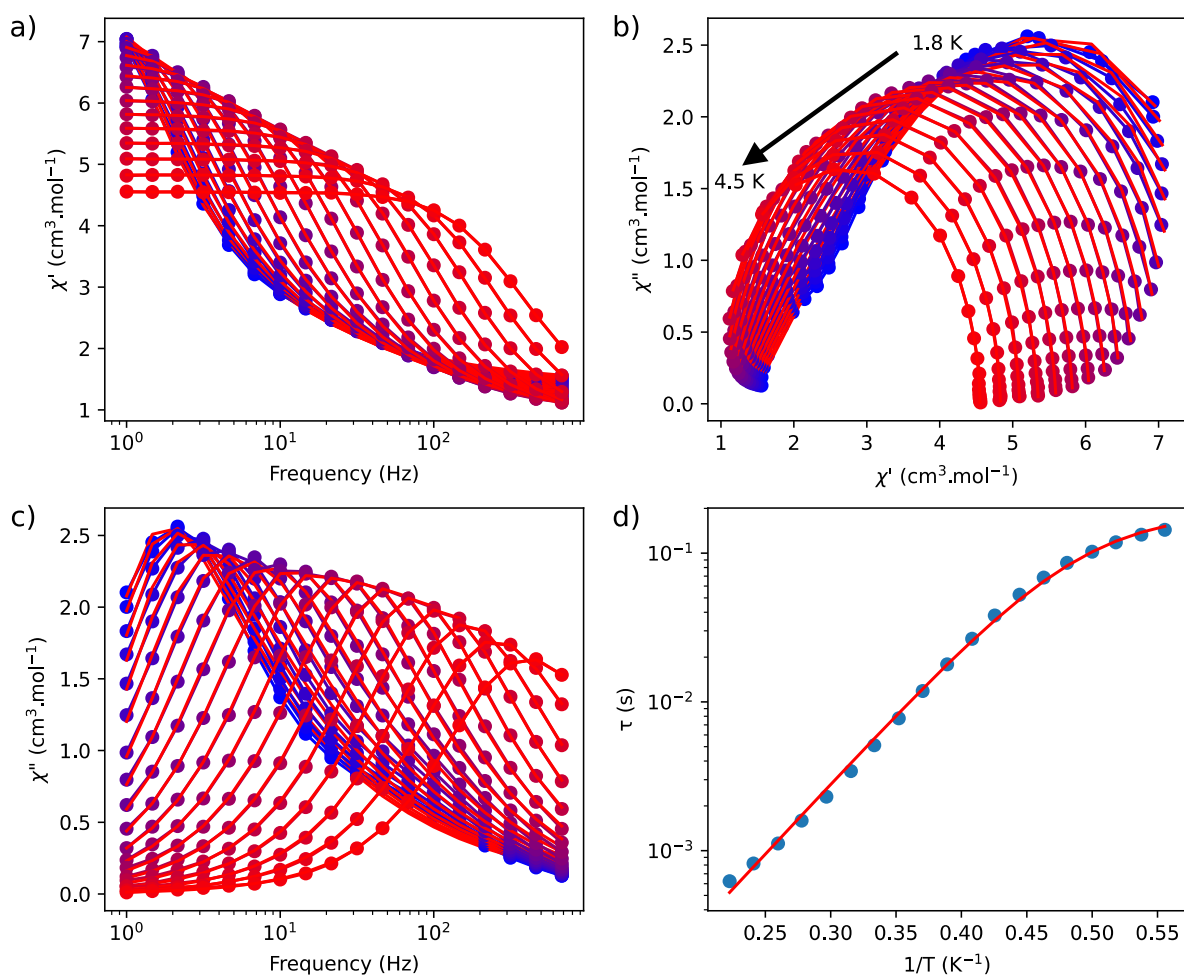

**Figure S16.** Frequency dependence of the in-phase,  $\chi'$ , (a) and out-of-phase,  $\chi''$  (c) components of the ac susceptibility for **6** under applied magnetic field of 1000 Oe. The red lines are the result of the Cole-Cole fitting. (b) Cole-Cole plots obtained using the frequency dependence of  $\chi''$  for **6** obtained under 1000 Oe. The solid lines correspond to the best fit obtained with a generalized Debye model. (d) Temperature dependence of the two relaxation times for **6** (1000 Oe) and the corresponding fit with eq. (2) (red solid line).

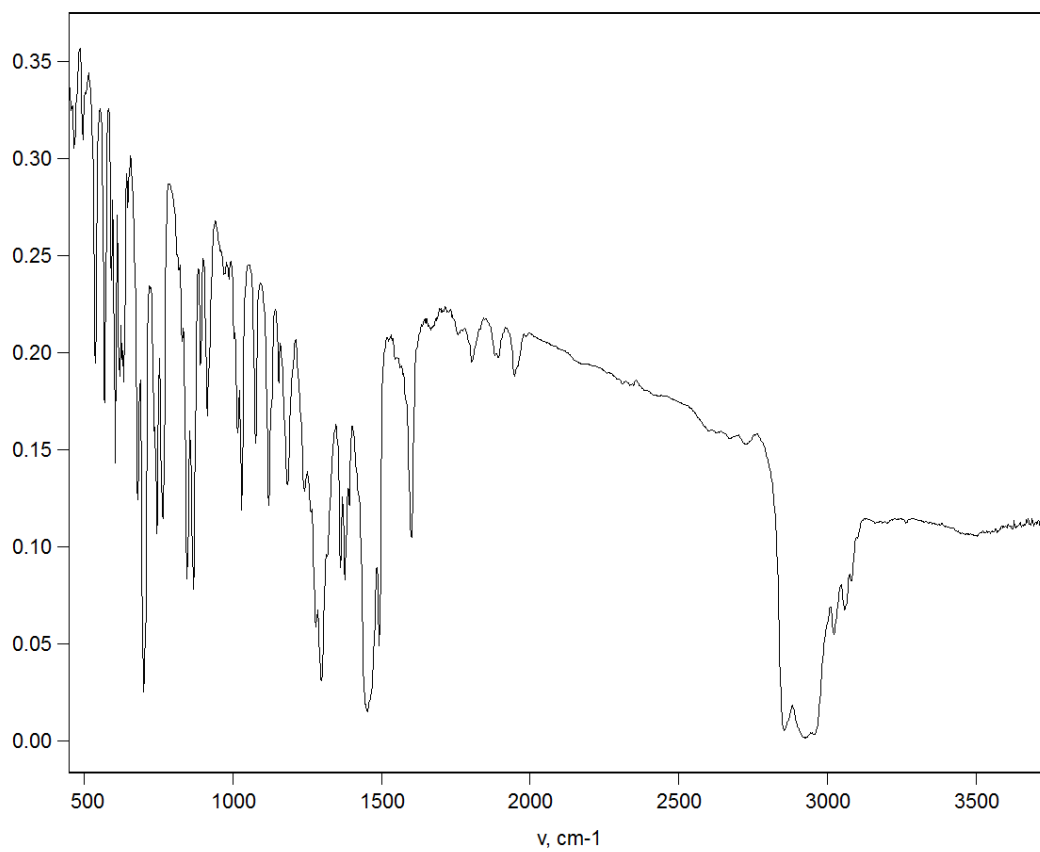

**Figure S17.** IR spectrum of  $[4\text{-}t\text{BuC}_6\text{H}_2(2,6\text{-benzhydryl)O}]_3\text{Er(THF) 1}$ .

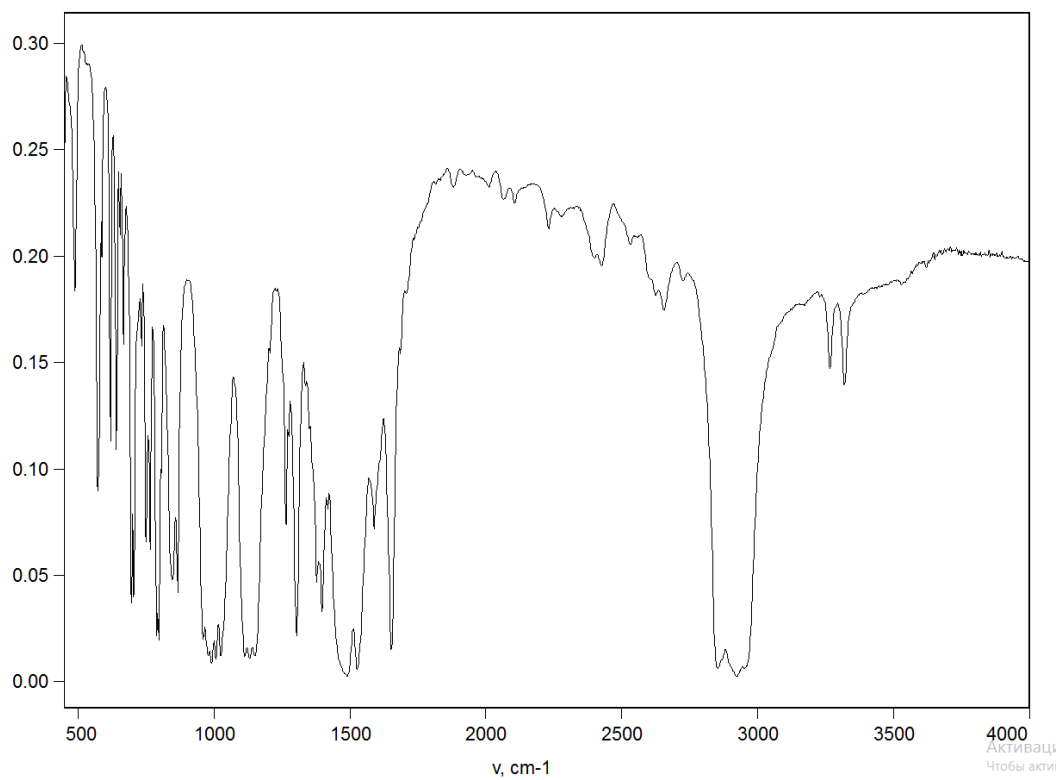

**Figure S18.** IR spectrum of  $[(\text{C}_6\text{F}_5)_3\text{CO}]_3\text{Er}(\text{Me}_3\text{SiOH) 2}$ .

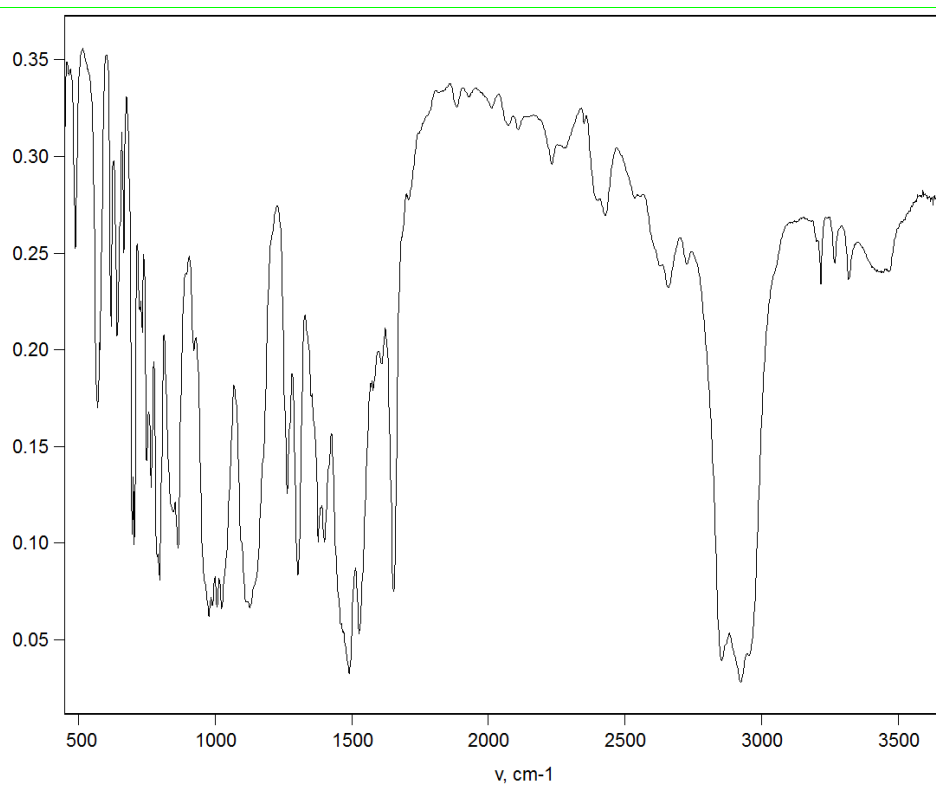

**Figure S19.** IR spectrum of  $[(C_6F_5)_3CO]_3Er((Me_3Si)_2NH)$  **3**.

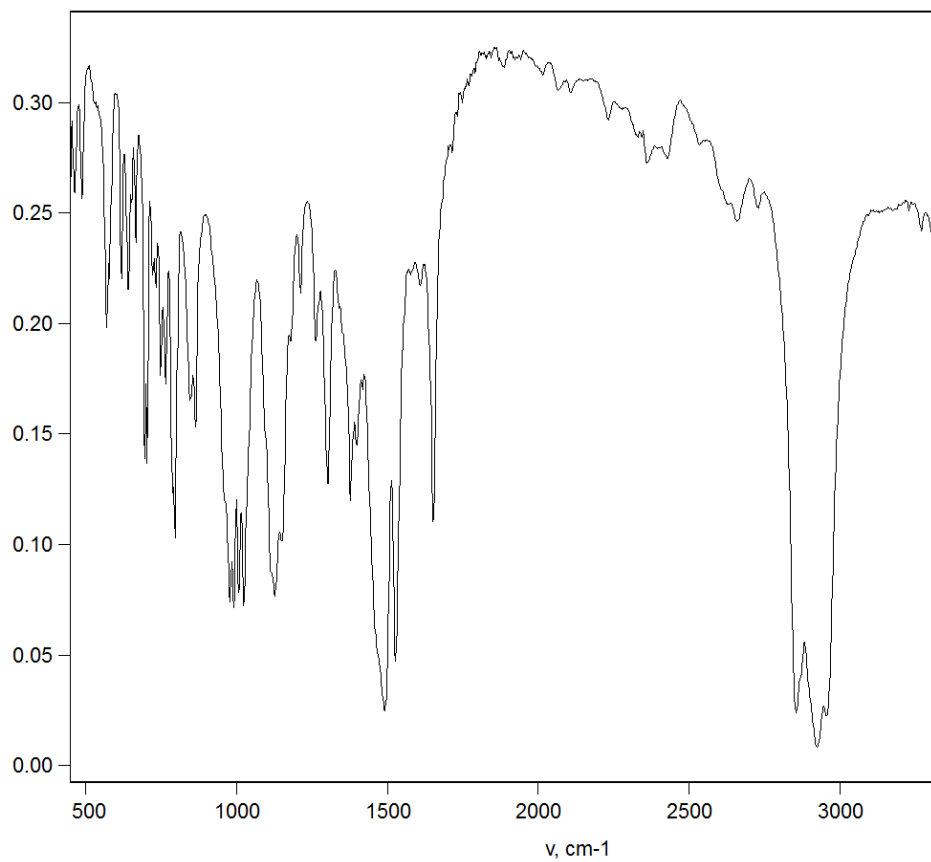

**Figure S20.** IR spectrum of  $[(C_6F_5)_3CO]_3Er(C_6H_5CH_3)$  **4**.

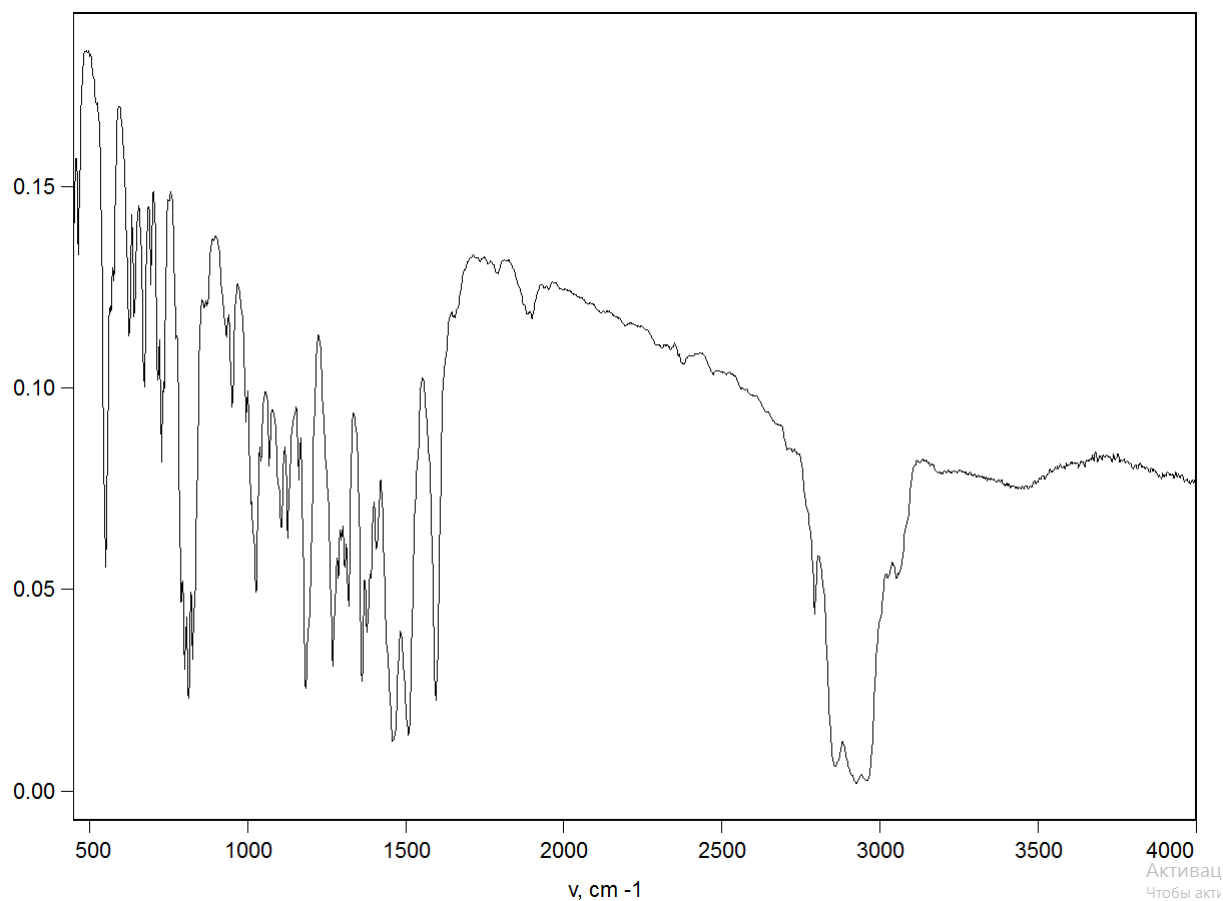

**Figure S21.** IR spectrum of  $[(C_6F_5)_3CO]_3Er(o-Me_2NC_6H_4CH_3)$  **5**.

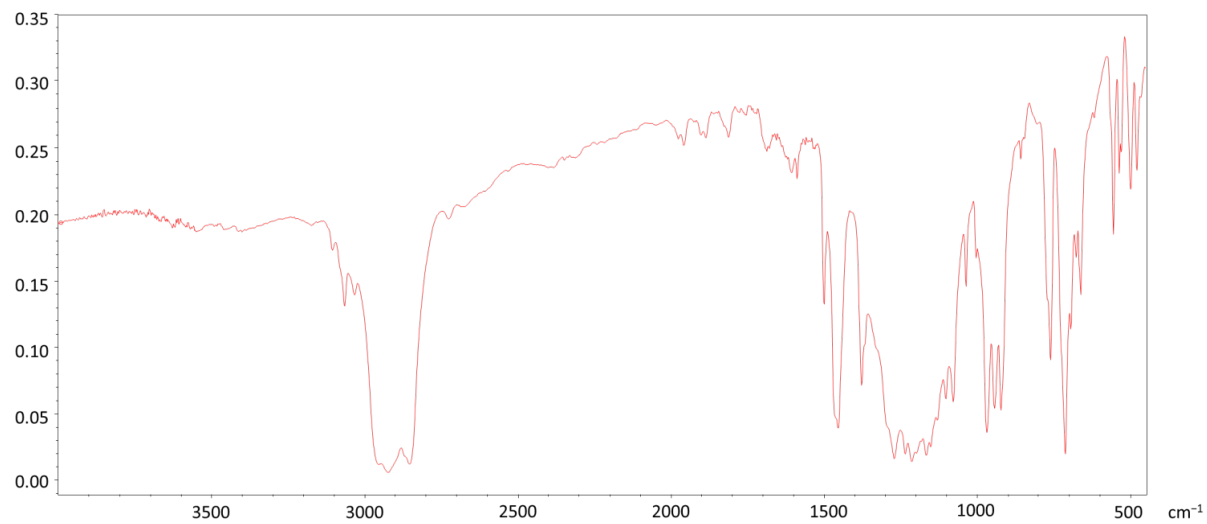

**Figure S22.** IR spectrum of  $\{[Ph(F_3C)_2CO]_2Er(\mu-OC(CF_3)_2Ph)\}_2$  **6**.

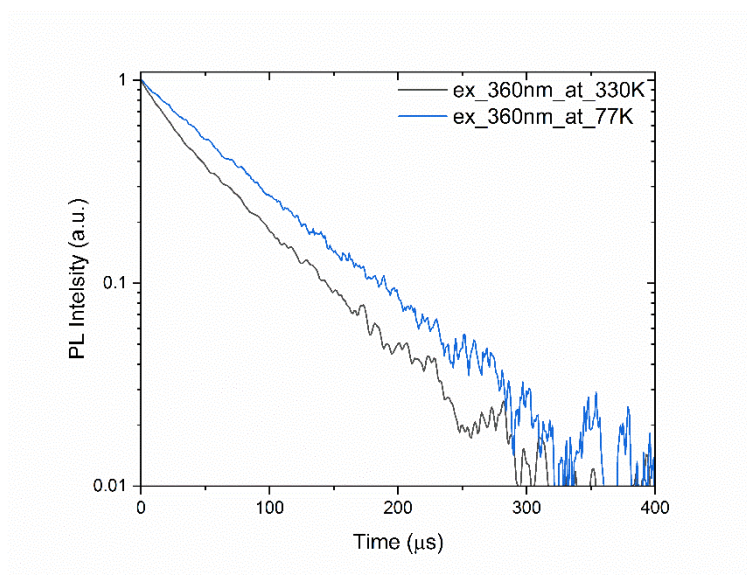

**Figure S23.** Luminescence kinetics of complex **4** in solid phase at temperatures of 77 and 300 K under optical excitation through ligand environment (360 nm). Recording wavelength is 1535 nm.

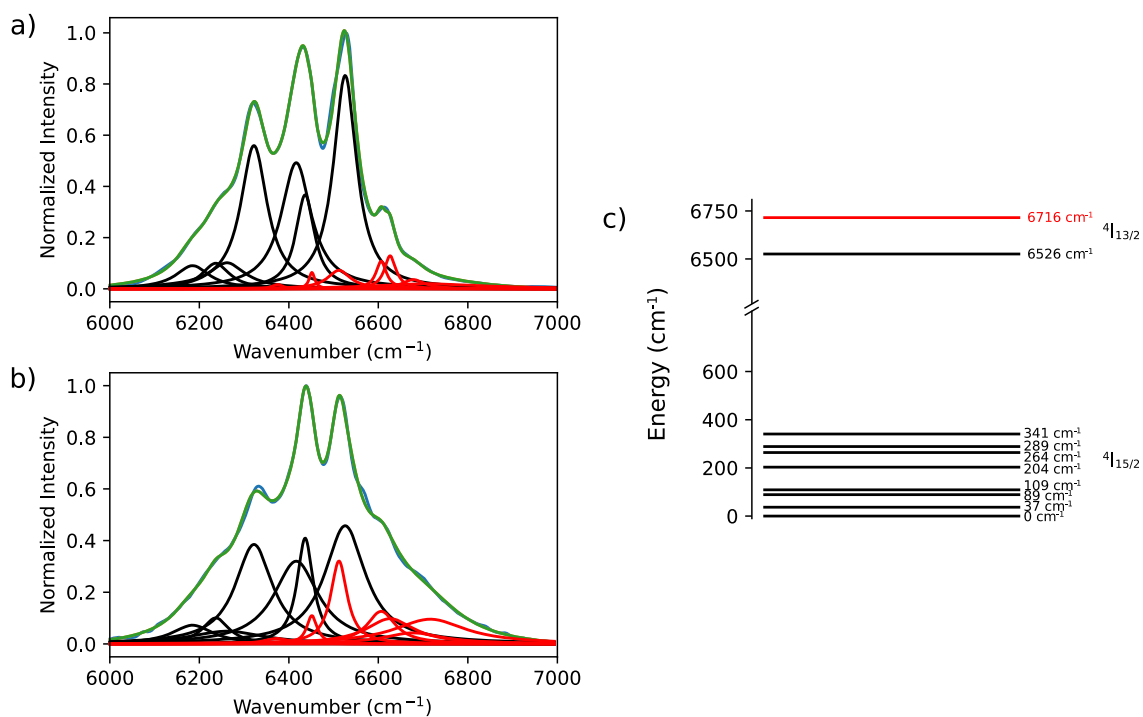

**Figure S24.** Experimental luminescence emission spectra for crystalline complexes **2** at 77 K (a) and 300 K (b). The blue and green curves represent the experimental data and the optimized fit. The black and red Lorentzian functions represent the radiative relaxation from the first and second <sup>4</sup>I<sub>13/2</sub> states, respectively. c) Schematic representation of the energy levels for sample **2**, extracted from the fitting process.

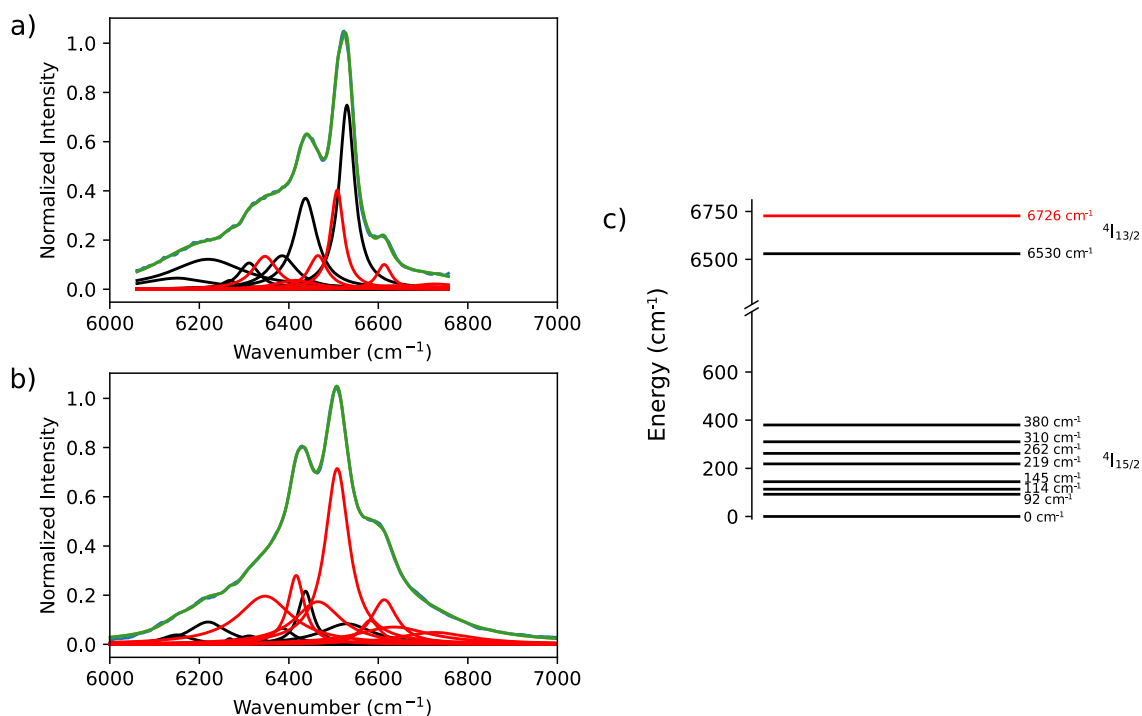

**Figure S25.** Experimental luminescence emission spectra for crystalline complexes **3** at 77 K (a) and 300 K (b). The blue and green curves represent the experimental data and the optimized fit. The black and red Lorentzian functions represent the radiative relaxation from the first and second  ${}^4I_{13/2}$  states, respectively. c) Schematic representation of the energy levels for sample **3**, extracted from the fitting process.

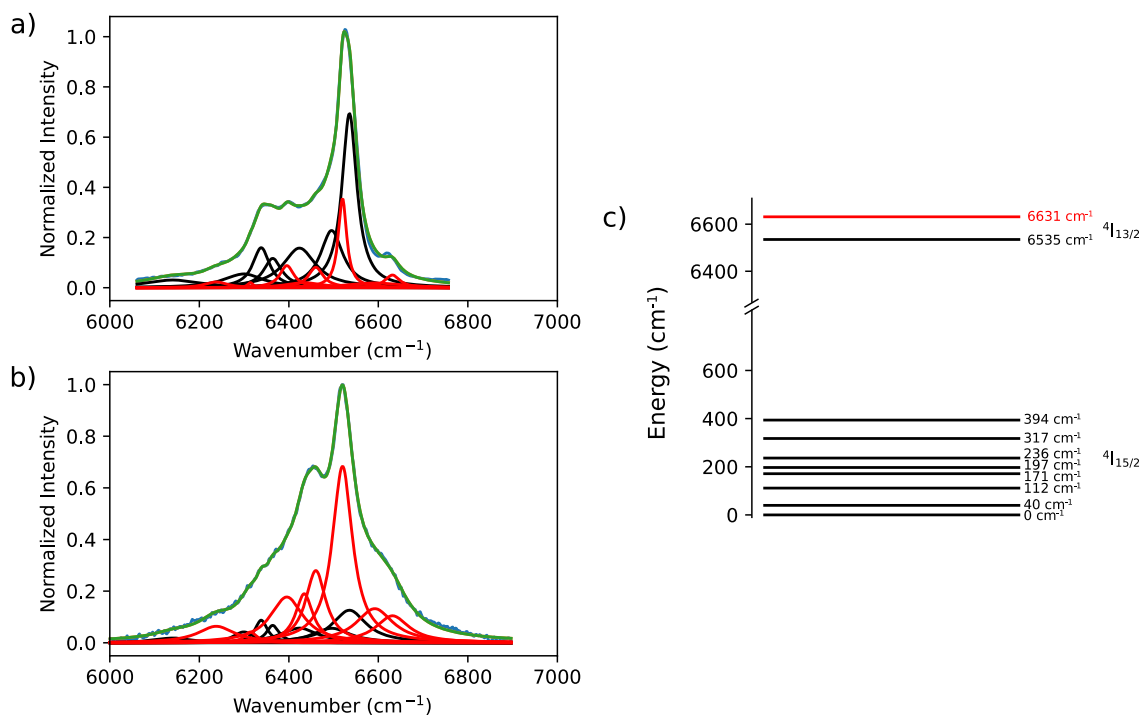

**Figure S26.** Experimental luminescence emission spectra for crystalline complexes **4** at 77 K (a) and 300 K (b). The blue and green curves represent the experimental data and the optimized fit. The black and red Lorentzian functions represent the radiative relaxation from the first and second  ${}^4I_{13/2}$  states, respectively. c) Schematic representation of the energy levels for sample **4**, extracted from the fitting process.



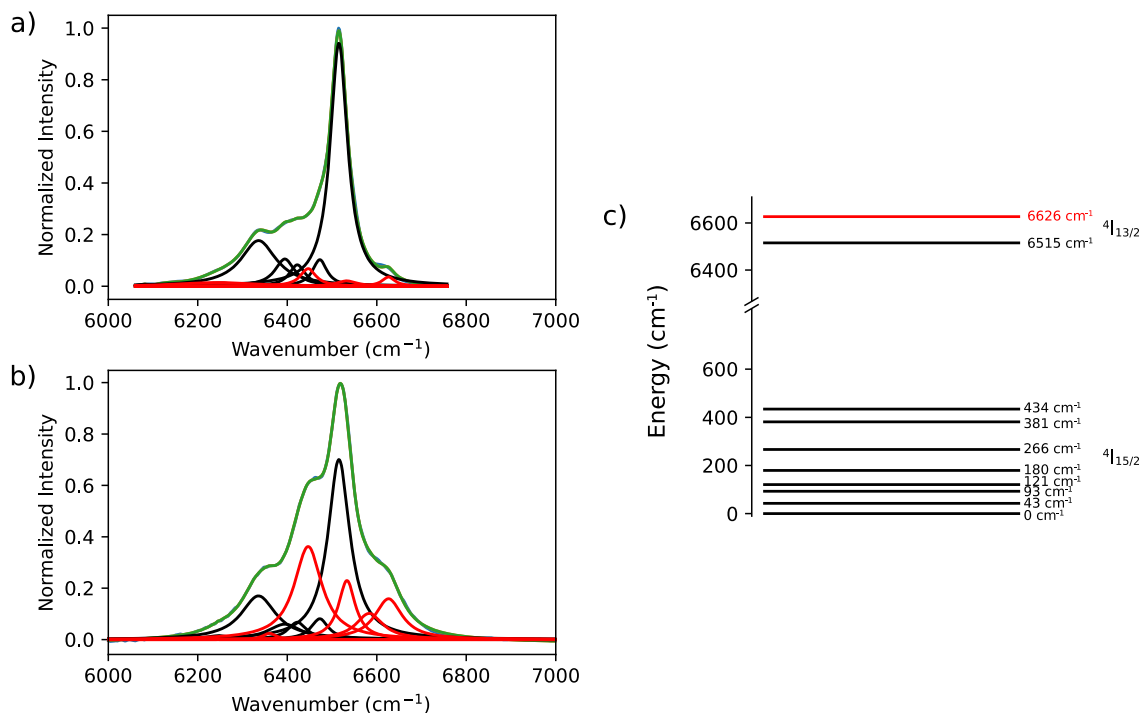

**Figure S27.** Experimental luminescence emission spectra for crystalline complexes **5** at 77 K (a) and 300 K (b). The blue and green curves represent the experimental data and the optimized fit. The black and red Lorentzian functions represent the radiative relaxation from the first and second  ${}^4I_{13/2}$  states, respectively. c) Schematic representation of the energy levels for sample **5**, extracted from the fitting process.

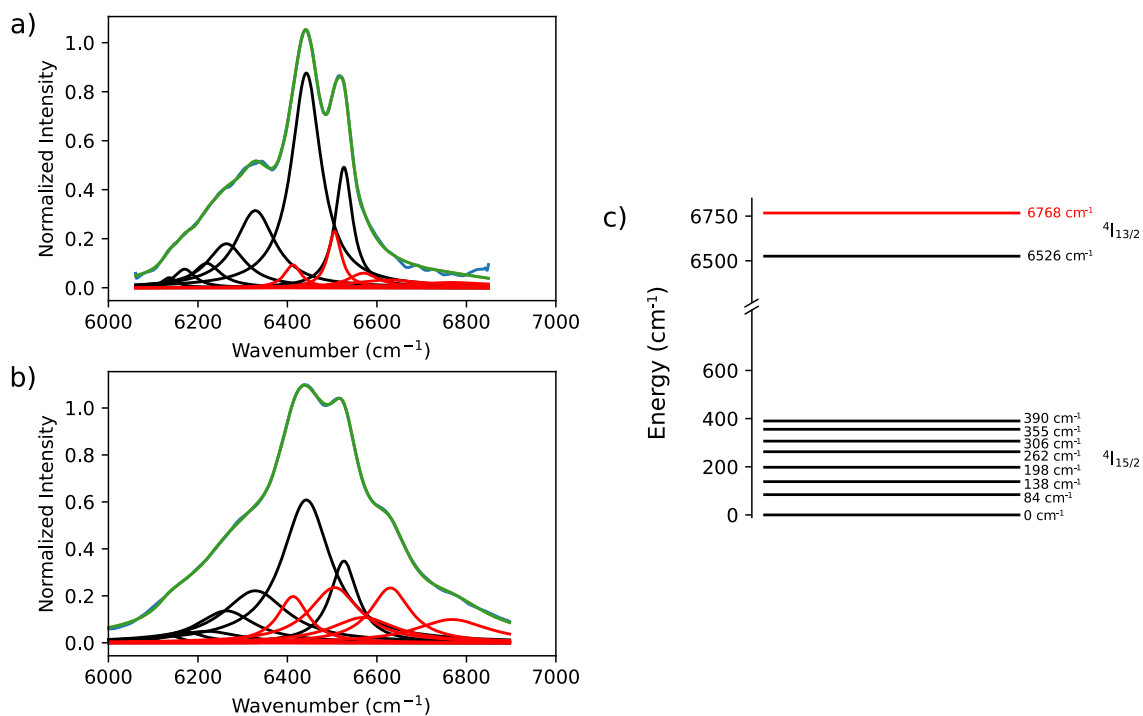

**Figure S28.** Experimental luminescence emission spectra for crystalline complexes **6** at 77 K (a) and 300 K (b). The blue and green curves represent the experimental data and the optimized fit. The black and red Lorentzian functions represent the radiative relaxation from the first and second  ${}^4I_{13/2}$  states, respectively. c) Schematic representation of the energy levels for sample **6**, extracted from the fitting process.

**Table S1:** Representative examples of Er<sup>3+</sup> luminescent SMMs.

| Compounds                                                                                                                                                                                                                                 | Magnetism                                                                                                                                                                                                                                             | Luminescence                                                                                                                                                                                                                                                                                                                                                                                                 | Ref.          |
|-------------------------------------------------------------------------------------------------------------------------------------------------------------------------------------------------------------------------------------------|-------------------------------------------------------------------------------------------------------------------------------------------------------------------------------------------------------------------------------------------------------|--------------------------------------------------------------------------------------------------------------------------------------------------------------------------------------------------------------------------------------------------------------------------------------------------------------------------------------------------------------------------------------------------------------|---------------|
| [Er(thd) <sub>3</sub> (bath)]<br>8-coordinated Er <sup>3+</sup>                                                                                                                                                                           | Field induced SMM,<br>two relaxations: U <sub>eff</sub> = 15.6<br>and 22.4 K.                                                                                                                                                                         | RT NIR emission, λ <sub>ex</sub> =337 nm<br>(antenna effect), λ <sub>em</sub> =1532 nm,<br>associated with the <sup>4</sup> I <sub>13/2</sub> → <sup>4</sup> I <sub>15/2</sub><br>transition                                                                                                                                                                                                                 | <sup>1</sup>  |
| 8-coordinated Er <sup>3+</sup><br>[Er(h) <sub>3</sub> (bipy)]<br>[Er(h) <sub>3</sub> (5NO <sub>2</sub> phen)]<br>[Er(h) <sub>3</sub> (bath)]                                                                                              | Field induced SMMs,<br>U <sub>eff</sub> =7.98 K<br>U <sub>eff</sub> =12.97 K<br>U <sub>eff</sub> =22.81 K                                                                                                                                             | RT NIR emission, λ <sub>ex</sub> =405 nm<br>(antenna effect), λ <sub>em</sub> ~1532 nm,<br>associated with the <sup>4</sup> I <sub>13/2</sub> → <sup>4</sup> I <sub>15/2</sub><br>transition                                                                                                                                                                                                                 | <sup>2</sup>  |
| [Er(notpH <sub>4</sub> )(H <sub>2</sub> O)]ClO <sub>4</sub> ·3H <sub>2</sub> O<br>2D layered coordination polymer                                                                                                                         | Field induced SMM,<br>U <sub>eff</sub> =24 cm <sup>-1</sup><br>Correlation with<br>luminescence thanks to the<br>presence of hot bands<br>(emission from <sup>4</sup> I <sub>13/2</sub><br>multiplet) → energy<br>diagram of the Stark-sub-<br>levels | RT NIR emission, λ <sub>ex</sub> = 1064<br>nm (direct Er <sup>3+</sup> excitation),<br>λ <sub>em</sub> ~1532 nm. The luminescence<br>permitted to establish the energy<br>diagram and determine the<br>energy gap between the ground<br>and first excited state of the <sup>4</sup> I <sub>15/2</sub><br>CF splitting of 31.2 cm <sup>-1</sup> , close<br>to the U <sub>eff</sub> of 24.2 cm <sup>-1</sup> . | <sup>3</sup>  |
| [Er(dbm) <sub>3</sub> (bipy)]<br>8-coordinated Er <sup>3+</sup>                                                                                                                                                                           | Field induced SMM, U <sub>eff</sub><br>=19.8 K.                                                                                                                                                                                                       | RT NIR emission, λ <sub>ex</sub> =380 nm<br>(antenna effect), λ <sub>em</sub> =1532 nm,<br>associated to the <sup>4</sup> I <sub>13/2</sub> → <sup>4</sup> I <sub>15/2</sub><br>transition; life time 1.1 μs                                                                                                                                                                                                 | <sup>4</sup>  |
| [ErL <sup>1</sup> <sub>3</sub> ]·CH <sub>3</sub> OH<br>[ErL <sup>1</sup> <sub>2</sub> (tmh)(CH <sub>3</sub> OH)]·Solv<br>[ErL <sup>1</sup> <sub>2</sub> (tta)(CH <sub>3</sub> OH)]·CH <sub>3</sub> OH<br>8-coordinated Er <sup>3+</sup>   | Field induced SMM,<br>U <sub>eff</sub> =16.0 K<br>U <sub>eff</sub> =30.4 K<br>U <sub>eff</sub> =25.8 K.                                                                                                                                               | RT NIR emission, λ <sub>ex</sub> =355 nm<br>(antenna effect), λ <sub>em</sub> =1530 nm,<br>associated to the <sup>4</sup> I <sub>13/2</sub> → <sup>4</sup> I <sub>15/2</sub><br>transition; life time 2.37 μs.                                                                                                                                                                                               | <sup>5</sup>  |
| [Er(depma) <sub>2</sub> (H <sub>2</sub> O) <sub>6</sub> ]Cl <sub>3</sub> ]·Solv                                                                                                                                                           | Field induced SMM,<br>U <sub>eff</sub> =9.8 K                                                                                                                                                                                                         | λ <sub>ex</sub> =330 nm, RT visible emission<br>from anthracene λ <sub>em</sub> =450 nm.                                                                                                                                                                                                                                                                                                                     | <sup>6</sup>  |
| (nBu <sub>4</sub> N) <sub>2</sub> [Er(NO <sub>3</sub> ) <sub>5</sub> ]<br>10-coordinated Er <sup>3+</sup>                                                                                                                                 | Field induced SMM,<br>U <sub>eff</sub> =22.3 K                                                                                                                                                                                                        | Very low RT NIR emission, at<br>1550 nm associated to the<br><sup>4</sup> I <sub>13/2</sub> → <sup>4</sup> I <sub>15/2</sub> transition                                                                                                                                                                                                                                                                      | <sup>7</sup>  |
| 8-coordinated Er <sup>3+</sup><br>[Er(tpm) <sub>3</sub> (bipy)]<br><br>[Er(tfa) <sub>3</sub> (bipy)]                                                                                                                                      | Genuine SMM<br>U <sub>eff</sub> =21 K (zero DC<br>applied field)<br>Field induced SMM<br>U <sub>eff</sub> =15 K                                                                                                                                       | RT NIR emission, λ <sub>ex</sub> =337 or<br>532 nm (antenna effect),<br>λ <sub>em</sub> =1532 nm, associated to the<br><sup>4</sup> I <sub>13/2</sub> → <sup>4</sup> I <sub>15/2</sub> transition; life time<br>1.24 μs                                                                                                                                                                                      | <sup>8</sup>  |
| Coordination polymers<br>[Er{Ir(ppy) <sub>2</sub> (dcbpy)} <sub>2</sub> (NO <sub>3</sub> )(H <sub>2</sub> O) <sub>n</sub> ]<br>[Er <sub>2</sub> (OH){Ir(ppy) <sub>2</sub> (dcbpy)} <sub>4</sub> (NO <sub>3</sub> )(H<br>O) <sub>4</sub> ] | Field induced SMM,<br>U <sub>eff</sub> =13.6 K<br>U <sub>eff</sub> =11.8 K                                                                                                                                                                            | Emission at 584 nm from Ir unit<br>(λ <sub>ex</sub> =375 nm) and at 1538 nm<br>(λ <sub>ex</sub> = 500 nm); life time 1.4 μs<br>(λ <sub>ex</sub> =500 nm)                                                                                                                                                                                                                                                     | <sup>9</sup>  |
| 3D neutral polymorphic frameworks<br>[Er <sub>2</sub> (trz <sub>2</sub> An) <sub>3</sub> (H <sub>2</sub> O) <sub>4</sub> ] <sub>n</sub> ·H <sub>2</sub> O                                                                                 | Field induced SMM,<br>U <sub>eff</sub> =42 K                                                                                                                                                                                                          | NIR emission at 77K and RT,<br>λ <sub>ex</sub> =355 nm (antenna effect),<br>emission associated to the Er <sup>3+</sup>                                                                                                                                                                                                                                                                                      | <sup>10</sup> |

|                                                                            |                                                                |                                                                                                                                                                            |               |
|----------------------------------------------------------------------------|----------------------------------------------------------------|----------------------------------------------------------------------------------------------------------------------------------------------------------------------------|---------------|
|                                                                            |                                                                | $^4I_{13/2} \rightarrow ^4I_{15/2}$ transition; life time of 55 ns and 86 ns                                                                                               |               |
| $(Et_3NH)[Er(L^2)_2] \cdot 1.5H_2O$<br>$[Zn(\mu-L^3)(\mu-NO_3)Er(NO_3)_2]$ | Field induced SMM,<br>$U_{eff}=8$ K,<br>$U_{eff}=15$ $cm^{-1}$ | NIR emission at RT, $\lambda_{ex}=380-649$ nm (antenna effect), $\lambda_{em}=1550$ nm associated to the $^4I_{13/2} \rightarrow ^4I_{15/2}$ transition.                   | <sup>11</sup> |
| $[Zn(\mu-L^3)(\mu-OAc)Er(NO_3)_2]$                                         | Field induced SMM,<br>$U_{eff}=8$ $cm^{-1}$                    | NIR emission at RT, $\lambda_{ex}=355$ nm, $\lambda_{em}=1530$ nm associated to the $^4I_{13/2} \rightarrow ^4I_{15/2}$ transition; life time 2.77 $\mu s$ , 11.82 $\mu s$ | <sup>12</sup> |
| $[Er(hfac)_3(tempo)_2]$                                                    | Field induced SMM,<br>$U_{eff}=12$ $cm^{-1}$                   | NIR emission at 4.2K, $\lambda_{em}$ associated to the $^4I_{13/2} \rightarrow ^4I_{15/2}$ transition; life time 11.82 $\mu s$ .                                           | <sup>13</sup> |

thd = 2,2,6,6-tetramethyl-3,5-heptanedionate, bath = bathophenanthroline; h = 2,4-hexanedionate; bipy = 2,2'-bipyridine; 5NO<sub>2</sub>phen = 5-nitro-1,10-phenanthroline; bath = bathophenanthroline; notpH<sub>4</sub><sup>2-</sup> = 1,4,7-triazacyclononane-1,4,7-triyl-tris(methylenephosphonate); dbm = dibenzoylmethanate; HL<sup>1</sup>=2-(tetrazol-5-yl)-1,10-phenanthroline; tmh = 2,2,6,6-tetramethylheptanoate; tta = thenoyltrifluoroacetate; ppy = 2-phenylpyridine; dcbpy = 2,2'-bipyridine-4,4'-dicarboxylate; depma = 9-diethylphosphono-methylanthracene; Htpm = 1,1,1-trifluoro-5,5-dimethyl-2,4-hexanedione; Htfa = 4,4,4-trifluoro-1-(2-furyl)-1,3-butanedione); SYML=(N,N0-bis(1-naphthaldiamine)-O-phenylenediamine); H<sub>2</sub>trz<sub>2</sub>An = 3,6-N-ditriazolyl-2,5-dihydroxy-1,4-benzoquinone. L<sup>2</sup> = N,N'-bis(3-nitro-salicylaldehyde)ethylenediamine dianion); H<sub>2</sub>L<sup>3</sup> = N,N',N''-trimethyl-N,N''-bis(2-hydroxy-3-methoxy-5-methylbenzyl)diethylenetriamine ; TEMPO = (2,2,6,6-tetramethylpiperidin-1-oxyl) radical.

**Table S2:** Crystal data, data collection and structure refinement details for **1-6**.

|                                              | <b>1</b>                                                          | <b>2</b>                                                            | <b>3</b>                                                                          | <b>4</b>                                                          | <b>5</b>                                                          | <b>6</b>                                                                       |
|----------------------------------------------|-------------------------------------------------------------------|---------------------------------------------------------------------|-----------------------------------------------------------------------------------|-------------------------------------------------------------------|-------------------------------------------------------------------|--------------------------------------------------------------------------------|
| Formula                                      | C <sub>122.5</sub> H <sub>119</sub> ErO <sub>4</sub>              | C <sub>60</sub> H <sub>10</sub> ErF <sub>45</sub> O <sub>4</sub> Si | C <sub>63</sub> H <sub>19</sub> ErF <sub>45</sub> NO <sub>3</sub> Si <sub>2</sub> | C <sub>64</sub> H <sub>8</sub> ErF <sub>45</sub> O <sub>3</sub>   | C <sub>66</sub> H <sub>13</sub> ErF <sub>45</sub> NO <sub>3</sub> | C <sub>54</sub> H <sub>30</sub> Er <sub>2</sub> F <sub>36</sub> O <sub>6</sub> |
| <i>M</i>                                     | 1822.43                                                           | 1845.03                                                             | 1916.23                                                                           | 1846.96                                                           | 1890.03                                                           | 1793.30                                                                        |
| <i>T</i> , K                                 | 100.0(2)                                                          | 100.0(2)                                                            | 100.0(2)                                                                          | 100.0(2)                                                          | 100.0(2)                                                          | 100.0(2)                                                                       |
| Crystal system                               | Triclinic                                                         | Trigonal                                                            | Triclinic                                                                         | Triclinic                                                         | Triclinic                                                         | Triclinic                                                                      |
| Space group                                  | <i>P</i> -1                                                       | <i>R</i> -3                                                         | <i>P</i> -1                                                                       | <i>P</i> -1                                                       | <i>P</i> -1                                                       | <i>P</i> -1                                                                    |
| <i>a</i> , Å                                 | 13.02470(10)                                                      | 17.2887(3)                                                          | 14.7886(4)                                                                        | 13.5916(6)                                                        | 15.0250(4)                                                        | 11.2800(2)                                                                     |
| <i>b</i> , Å                                 | 14.11930(10)                                                      | 17.2887(3)                                                          | 15.4929(4)                                                                        | 15.0450(5)                                                        | 15.1826(4)                                                        | 13.6848(3)                                                                     |
| <i>c</i> , Å                                 | 27.7895(2)                                                        | 35.2684(5)                                                          | 18.0735(4)                                                                        | 18.6919(8)                                                        | 15.5060(4)                                                        | 20.1615(5)                                                                     |
| $\alpha$ , deg                               | 84.4770(10)                                                       | 90                                                                  | 94.9370(10)                                                                       | 73.966(3)                                                         | 84.4720(10)                                                       | 100.9240(10)                                                                   |
| $\beta$ , deg                                | 83.5680(10)                                                       | 90                                                                  | 112.0700(10)                                                                      | 79.560(3)                                                         | 83.219(2)                                                         | 104.5260(10)                                                                   |
| $\gamma$ , deg                               | 72.6830(10)                                                       | 120                                                                 | 96.0260(10)                                                                       | 64.614(2)                                                         | 83.909(2)                                                         | 94.4460(10)                                                                    |
| <i>V</i> , Å <sup>3</sup>                    | 4837.46(7)                                                        | 9129.4(3)                                                           | 3780.78(17)                                                                       | 3310.1(2)                                                         | 3480.03(16)                                                       | 2932.43(11)                                                                    |
| <i>Z</i>                                     | 2                                                                 | 6                                                                   | 2                                                                                 | 2                                                                 | 2                                                                 | 2                                                                              |
| <i>d</i> <sub>calc</sub> , g/cm <sup>3</sup> | 1.251                                                             | 2.014                                                               | 1.683                                                                             | 1.853                                                             | 1.804                                                             | 2.031                                                                          |
| $\mu$ , mm <sup>-1</sup>                     | 0.923                                                             | 1.587                                                               | 1.296                                                                             | 1.441                                                             | 1.374                                                             | 3.007                                                                          |
| <i>F</i> <sub>000</sub>                      | 1908                                                              | 5334                                                                | 1858                                                                              | 1778                                                              | 1826                                                              | 1724                                                                           |
| Crystal dimensions, mm                       | 0.62×0.50×0.34                                                    | 0.15×0.10×0.10                                                      | 0.15×0.10×0.05                                                                    | 0.25×0.25×0.02                                                    | 0.25×0.20×0.03                                                    | 0.25×0.20×0.03                                                                 |
| $\theta$ range for data collection, deg      | 1.74–30.03                                                        | 2.36–27.00                                                          | 1.86–27.00                                                                        | 1.82–26.00                                                        | 1.80–27.00                                                        | 1.88–27.00                                                                     |
| Completeness, %                              | 99.9                                                              | 99.9                                                                | 99.7                                                                              | 96.5                                                              | 99.7                                                              | 99.8                                                                           |
| <i>HKL</i> indices                           | -18 ≤ <i>h</i> ≤ 18<br>-19 ≤ <i>k</i> ≤ 19<br>-39 ≤ <i>l</i> ≤ 39 | -22 ≤ <i>h</i> ≤ 22<br>-18 ≤ <i>k</i> ≤ 22<br>-45 ≤ <i>l</i> ≤ 45   | -18 ≤ <i>h</i> ≤ 18<br>-17 ≤ <i>k</i> ≤ 19<br>-23 ≤ <i>l</i> ≤ 23                 | -10 ≤ <i>h</i> ≤ 16<br>-18 ≤ <i>k</i> ≤ 18<br>-22 ≤ <i>l</i> ≤ 23 | -19 ≤ <i>h</i> ≤ 19<br>-19 ≤ <i>k</i> ≤ 19<br>-18 ≤ <i>l</i> ≤ 19 | -14 ≤ <i>h</i> ≤ 14<br>-17 ≤ <i>k</i> ≤ 17<br>-25 ≤ <i>l</i> ≤ 22              |
| Reflns. collected                            | 170147                                                            | 34659                                                               | 42913                                                                             | 23913                                                             | 37911                                                             | 32777                                                                          |
| Reflns. unique ( <i>I</i> > 2σ( <i>I</i> ))  | 26368                                                             | 4092                                                                | 12863                                                                             | 6906                                                              | 12837                                                             | 11020                                                                          |
| <i>R</i> <sub>int</sub>                      | 0.0468                                                            | 0.0320                                                              | 0.0597                                                                            | 0.0843                                                            | 0.0385                                                            | 0.0355                                                                         |

|                                               |                     |                 |                  |                   |                   |                 |
|-----------------------------------------------|---------------------|-----------------|------------------|-------------------|-------------------|-----------------|
| Data / restraints / parameters                | 28285 / 1109 / 1199 | 4433 / 13 / 346 | 16441 / 0 / 1042 | 12557 / 30 / 1021 | 15149 / 56 / 1058 | 12801 / 0 / 883 |
| $S(F^2)$                                      | 1.044               | 1.079           | 0.996            | 0.958             | 1.020             | 1.061           |
| $R_1 / wR_2 (I > 2\sigma(I))$                 | 0.0320 / 0.0724     | 0.0324 / 0.0899 | 0.0477 / 0.1051  | 0.0725 / 0.1473   | 0.0427 / 0.0995   | 0.0304 / 0.0678 |
| $R_1 / wR_2$ (all data)                       | 0.0360 / 0.0740     | 0.0363 / 0.0935 | 0.0663 / 0.1125  | 0.1312 / 0.1673   | 0.0528 / 0.1044   | 0.0382 / 0.0710 |
| Largest diff. peak and hole, e/Å <sup>3</sup> | 0.86 / -1.31        | 0.94 / -1.33    | 1.49 / -0.86     | 1.42 / -1.35      | 1.34 / -0.75      | 1.40 / -1.10    |

**Table S3.** Main magnetic parameters utilized in Equation (1) for samples 1–6.

| Complex  | D (s <sup>-1</sup> .Oe <sup>-4</sup> .K <sup>-1</sup> ) | B <sub>1</sub> (s <sup>-1</sup> )                   | B <sub>2</sub> (Oe <sup>-2</sup> ) | C (s <sup>-1</sup> ) |
|----------|---------------------------------------------------------|-----------------------------------------------------|------------------------------------|----------------------|
|          |                                                         | B <sub>0</sub> (s <sup>-1</sup> .Oe <sup>-2</sup> ) |                                    |                      |
| <b>1</b> | (1.6 ± 0.1) 10 <sup>-11</sup>                           | 10 <sup>(4.2 ± 0.9)</sup>                           | 10 <sup>(-2.9 ± 0.9)</sup>         | 300 ± 7              |
| <b>2</b> | (5.4 ± 1.0) 10 <sup>-11</sup>                           | 10 <sup>(4.1 ± 1.0)</sup>                           | 10 <sup>(-3.0 ± 1.5)</sup>         | 150 ± 17             |
| <b>3</b> | (2.7 ± 0.7) 10 <sup>-12</sup>                           | (6.2 ± 1.5) 10 <sup>7</sup>                         |                                    | 174 ± 18             |
| <b>4</b> | (9.3 ± 2.0) 10 <sup>-15</sup>                           | (2.0 ± 0.2) 10 <sup>6</sup>                         |                                    | 4.0 ± 0.2            |
| <b>5</b> | (3.9 ± 0.7) 10 <sup>-11</sup>                           | 10 <sup>(3.4 ± 0.2)</sup>                           | 10 <sup>(-4.1 ± 0.3)</sup>         | 206 ± 28             |
| <b>6</b> | (7.4 ± 2.1) 10 <sup>-13</sup>                           | (4.8 ± 1.6) 10 <sup>6</sup>                         |                                    | 2.4 ± 2.1            |

## References

- 1 P. Martín-Ramos, M. Ramos Silva, J. T. Coutinho, L. C. J. Pereira, P. Chamorro-Posada and J. Martín-Gil, *European Journal of Inorganic Chemistry*, 2014, **2014**, 511–517.
- 2 M. R. Silva, P. Martín-Ramos, J. T. Coutinho, L. C. J. Pereira and J. Martín-Gil, *Dalton Trans.*, 2014, **43**, 6752–6761.
- 3 M. Ren, S.-S. Bao, R. A. S. Ferreira, L.-M. Zheng and L. D. Carlos, *Chem. Commun.*, 2014, **50**, 7621–7624.
- 4 P. Martín-Ramos, J. T. Coutinho, M. R. Silva, L. C. J. Pereira, F. Lahoz, P. S. P. da Silva, V. Lavín and J. Martín-Gil, *New J. Chem.*, 2015, **39**, 1703–1713.
- 5 J.-R. Jiménez, I. F. Díaz-Ortega, E. Ruiz, D. Aravena, S. J. A. Pope, E. Colacio and J. M. Herrera, *Chemistry – A European Journal*, 2016, **22**, 14548–14559.
- 6 Q. Zou, X.-D. Huang, J.-C. Liu, S.-S. Bao and L.-M. Zheng, *Dalton Trans.*, 2019, **48**, 2735–2740.
- 7 L. Chen, J. Zhou, A. Yuan and Y. Song, *Dalton Trans.*, 2017, **46**, 15812–15818.
- 8 M. R. Silva, P. Martín-Ramos, J. T. Coutinho, L. C. J. Pereira, V. Lavín, I. R. Martín, P. S. P. Silva and J. Martín-Gil, *Dalton Trans.*, 2014, **44**, 1264–1272.
- 9 K. Fan, S.-S. Bao, R. Huo, X.-D. Huang, Y.-J. Liu, Z.-W. Yu, M. Kurmoo and L.-M. Zheng, *Inorg. Chem. Front.*, 2020, **7**, 4580–4592.
- 10 N. Monni, J. J. Baldoví, V. García-López, M. Oggianu, E. Cadoni, F. Quochi, M. Clemente-León, M. L. Mercuri and E. Coronado, *Chem. Sci.*, 2022, **13**, 7419–7428.
- 11 M. Ren, Z.-L. Xu, S.-S. Bao, T.-T. Wang, Z.-H. Zheng, R. A. S. Ferreira, L.-M. Zheng and L. D. Carlos, *Dalton Trans.*, 2016, **45**, 2974–2982.
- 12 M. A. Palacios, S. Titos-Padilla, J. Ruiz, J. M. Herrera, S. J. A. Pope, E. K. Brechin and E. Colacio, *Inorg. Chem.*, 2014, **53**, 1465–1474.
- 13 M. Karbowiak, C. Rudowicz, T. Nakamura, R. Murakami and T. Ishida, *Chemical Physics Letters*, 2016, **662**, 163–168.
